# Supplementary material for: Comparison of Extracellular Vesicle Isolation Methods for miRNA Sequencing
Source: MDPI journal article supplement (doi:10.3390/ijms241512183), 2023-07-29
Supplement: s1 [file s1]

## Supplementary material for:

### Comparison of extracellular vesicle isolation methods for miRNAs sequencing

#### SEC

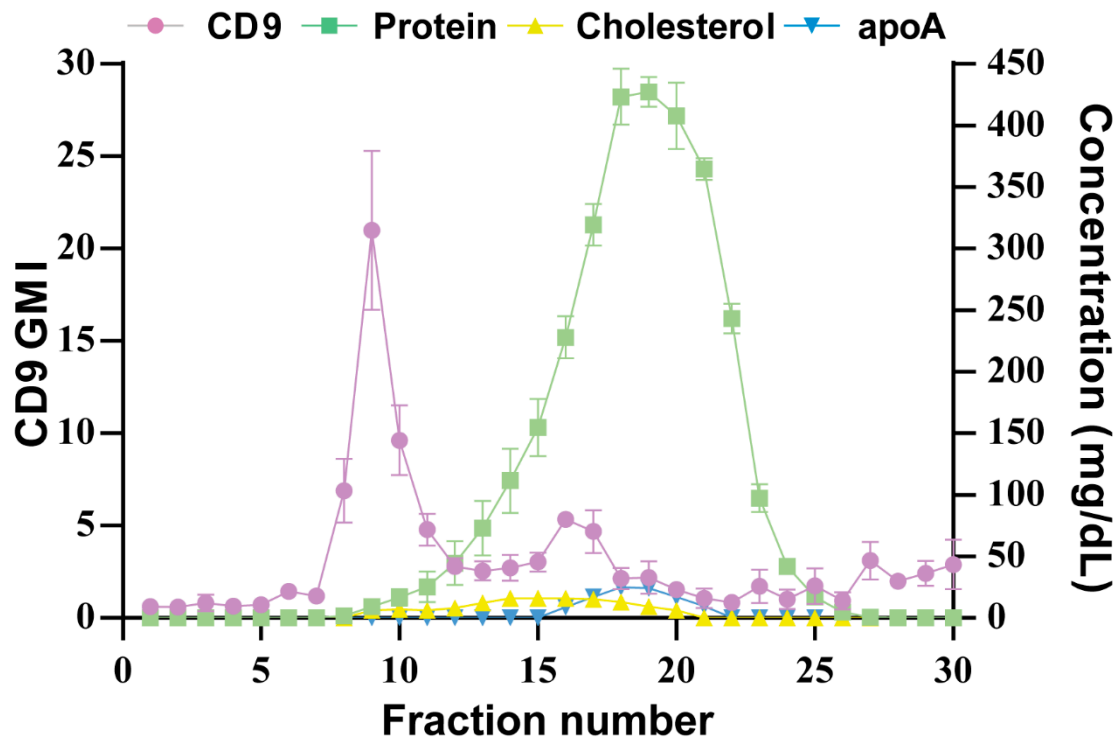

**Figure S1.** Characterization of all SEC fractions. CD9, ApoA, total cholesterol and total protein quantification. CD9 fluorescence intensity was measured as geometrical mean and plotted on the left ordinate axis. ApoA, total cholesterol and total proteins were measured as mg/dL and plotted on the right ordinate axis, fraction number is given in abscissa.

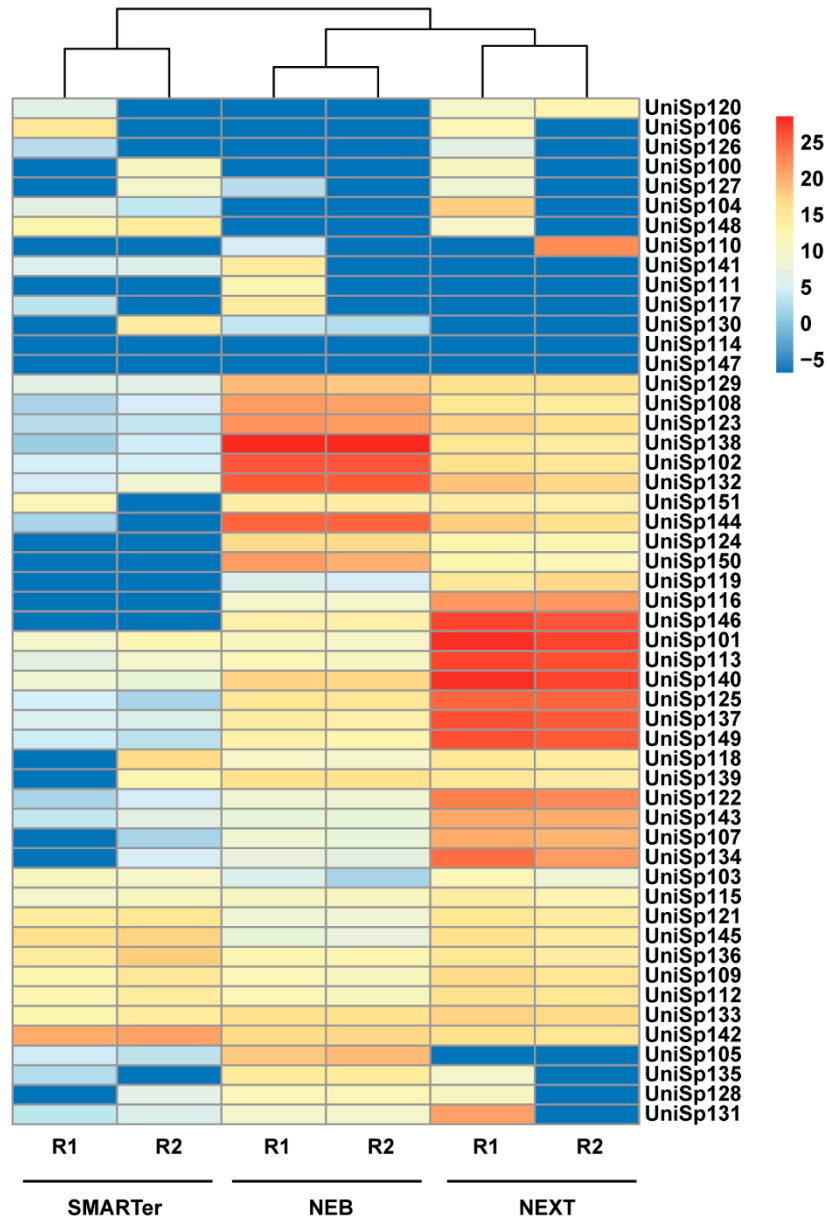

**Figure S2.** Heat map of normalized NOISEq counts of different spike-ins identified in the two replicas from each protocol (SMARTer, NEB and NEXT). Spike-ins (listed at the right) with a higher number of counts are depicted with red and yellow colors, and those with a lower number of counts are depicted with blue colors (scale at the top right). Heat map was plotted using the "pheatmap" R package over the log2 normalized values.

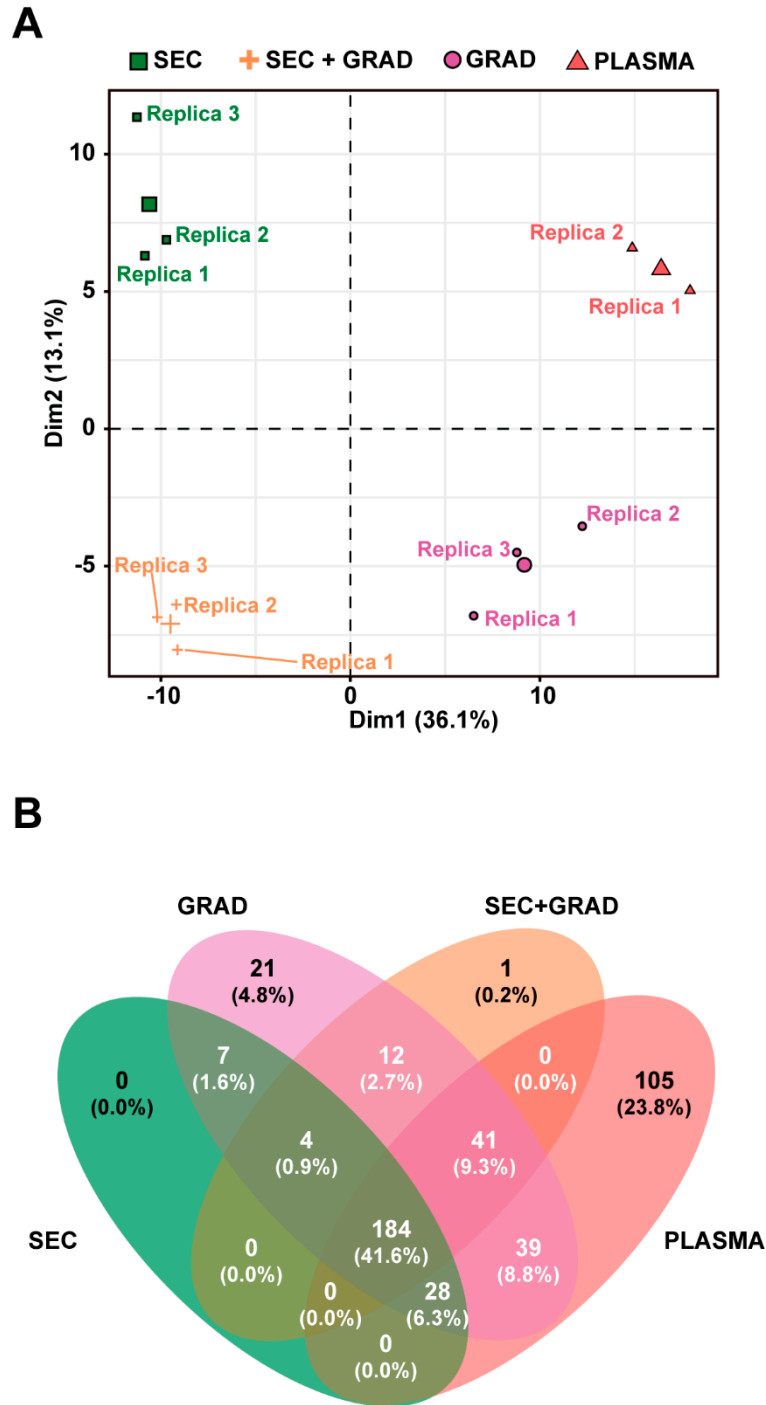

**Figure S3.** miRNA profiles of different EV isolation methods compared to the plasma sample. (A) Principal component analysis (PCA) showing that miRNA profiles are separated according to the sample. EVs methods were assessed in three independent experiments (Replica 1, Replica 2, and Replica 3). The fourth point is the centroid of the three replicas of each EV isolation method. Plasma sample was assessed in two independent experiments (Replica 1 and Replica 2). The third point is the centroid of the two replicas of each sample. (B) Venn diagram showing the relationship between miRNA profiles of circulating EVs obtained with different EV isolation methods and from the unfractionated plasma sample. Number and percentage of miRNAs detected by one, two, three or four samples are indicated. SEC, Size exclusion chromatography; GRAD, iodixanol gradient; SEC+GRAD, combination of size exclusion chromatography and iodixanol gradient

**Table S1.** Number of reads that remain after each of the steps of different library preparation methods in the bioinformatics process obtained by the ultra-deep sequencing analysis.

| <b>Library preparation method</b>                                | <b>Replica</b> | <b>Initial reads</b> | <b>Post-trimming<sup>a</sup></b> | <b>Too short<sup>b</sup></b> | <b>Too long<sup>c</sup></b> | <b>Aligned 0 times<sup>d</sup></b> | <b>Aligned exactly 1 time<sup>e</sup></b> | <b>Aligned &gt;1 times<sup>f</sup></b> | <b>No feature<sup>g</sup></b> | <b>Final reads<sup>h</sup></b> |
|------------------------------------------------------------------|----------------|----------------------|----------------------------------|------------------------------|-----------------------------|------------------------------------|-------------------------------------------|----------------------------------------|-------------------------------|--------------------------------|
| <b>NEBNext Multiplex Small RNA Library Prep Set for Illumina</b> | <b>1</b>       | 11,892,073           | 2,701,556                        | 486,910                      | 8,703,607                   | 634,166                            | 785,411                                   | 1,281,979                              | 413,514                       | <b>1,653,876</b>               |
|                                                                  | <b>2</b>       | 12,339,551           | 2,715,473                        | 631,422                      | 8,992,656                   | 664,003                            | 775,349                                   | 1,276,121                              | 402,348                       | <b>1,649,122</b>               |
| <b>NextFlex Small RNA-Seq v3</b>                                 | <b>1</b>       | 18,689,055           | 8,063,509                        | 1,850,873                    | 8,774,673                   | 2,055,648                          | 2,228,291                                 | 3,779,570                              | 1,184,404                     | <b>4,823,457</b>               |
|                                                                  | <b>2</b>       | 11,750,617           | 5,001,162                        | 1,470,510                    | 5,278,945                   | 1,798,933                          | 1,239,603                                 | 1,962,626                              | 682,706                       | <b>2,519,523</b>               |
| <b>SMARTer smRNA-Seq Kit for Illumina</b>                        | <b>1</b>       | 8,738,639            | 468,249                          | 1,577,605                    | 6,692,785                   | 115,613                            | 61,746                                    | 290,890                                | 347,252                       | <b>5,384</b>                   |
|                                                                  | <b>2</b>       | 8,727,581            | 395,306                          | 1,374,911                    | 6,957,364                   | 91,132                             | 56,476                                    | 247,698                                | 285,256                       | <b>18,918</b>                  |

<sup>a</sup> Number of reads between 17 and 25 nucleotides after trimming according to kit manufacturer instructions.

<sup>b</sup> Number of reads discarded to be shorter than 17 nucleotides.

<sup>c</sup> Number of reads discarded to be longer than 25 nucleotides.

<sup>d</sup> Number of reads discarded because do not map to human reference genome (assembly hg38).

<sup>e</sup> Number of reads that map one time to human reference genome (assembly hg38).

<sup>f</sup> Number of reads that map more than one time to human reference genome (assembly hg38).

<sup>g</sup> Number of reads discarded because they do not map to miRNAs coordinates.

<sup>h</sup> Number of reads after each of the steps in the bioinformatics process.

**Table S2.** Normalized counts of miRNAs detected using three different library preparations, and filtered by abundance (miRNAs with at least 50 reads).

| Accession Number <sup>a</sup> | NEBNext <sup>b</sup> |           | NEXTFlex <sup>c</sup> |           | SMARTer <sup>d</sup> |           |
|-------------------------------|----------------------|-----------|-----------------------|-----------|----------------------|-----------|
|                               | Replica 1            | Replica 2 | Replica 1             | Replica 2 | Replica 1            | Replica 2 |
| MIMAT0000062                  | 20955.5              | 19262.1   | 29495.8               | 27959.7   | 22795.2              | 34786.5   |
| MIMAT0000062_1                | 23376.0              | 19940.0   | 29928.9               | 28755.3   | 22795.2              | 37721.2   |
| MIMAT0000062_2                | 22924.3              | 20133.0   | 29687.4               | 29337.8   | 25210.6              | 39868.5   |
| MIMAT0000063                  | 69745.9              | 150564.7  | 43189.6               | 68745.2   | 82575.9              | 94052.4   |
| MIMAT0000064                  | 2175.0               | 2211.6    | 806.5                 | 1808.9    | 603.8                | 2290.5    |
| MIMAT0000065                  | 2527.1               | 1269.6    | 4470.8                | 5498.1    | 4377.9               | 1717.9    |
| MIMAT0000066                  | 1408.3               | 1493.0    | 1687.9                | 1219.6    | 2113.5               | 1861.0    |
| MIMAT0000067                  | 32428.1              | 28905.8   | 26390.8               | 27383.0   | 20530.7              | 33498.1   |
| MIMAT0000067_1                | 45014.8              | 43239.4   | 27893.9               | 28879.4   | 19021.1              | 35072.8   |
| MIMAT0000068                  | 18.5                 | 66.0      | 385.2                 | 134.4     | 0.0                  | 0.0       |
| MIMAT0000069                  | 384.5                | 347.9     | 12147.5               | 13791.4   | 1207.7               | 2218.9    |
| MIMAT0000069_1                | 370.6                | 358.0     | 12187.2               | 13883.9   | 3321.2               | 3221.0    |
| MIMAT0000070                  | 433.1                | 203.1     | 160.6                 | 0.0       | 3925.0               | 787.3     |
| MIMAT0000072                  | 4.6                  | 0.0       | 258.4                 | 0.0       | 0.0                  | 0.0       |
| MIMAT0000073                  | 250.2                | 71.1      | 102.5                 | 618.7     | 6189.4               | 1789.4    |
| MIMAT0000074                  | 169.1                | 213.3     | 79.5                  | 120.1     | 7699.0               | 3292.5    |
| MIMAT0000074_1                | 159.8                | 286.9     | 77.2                  | 116.6     | 7699.0               | 3722.0    |
| MIMAT0000075                  | 901.0                | 721.1     | 486.1                 | 2531.0    | 301.9                | 429.5     |
| MIMAT0000076                  | 119624.9             | 103900.0  | 105219.8              | 129114.9  | 2566.3               | 6871.4    |
| MIMAT0000077                  | 8927.0               | 10669.6   | 7823.8                | 9284.3    | 452.9                | 429.5     |
| MIMAT0000078                  | 440.1                | 137.1     | 23312.7               | 28109.6   | 30645.2              | 53038.7   |
| MIMAT0000079                  | 2.3                  | 12.7      | 59.7                  | 0.0       | 0.0                  | 0.0       |
| MIMAT0000080                  | 6992.9               | 6055.9    | 13673.0               | 16933.7   | 5736.5               | 10020.8   |
| MIMAT0000080_1                | 6891.0               | 6388.5    | 13781.2               | 16404.0   | 3472.1               | 12025.0   |
| MIMAT0000081                  | 29713.4              | 29487.3   | 4984.8                | 4458.9    | 22191.3              | 17965.9   |
| MIMAT0000082                  | 120820.1             | 106444.2  | 17445.2               | 21690.1   | 301.9                | 572.6     |
| MIMAT0000082_1                | 116623.0             | 106444.2  | 16577.7               | 20490.1   | 452.9                | 143.2     |
| MIMAT0000083                  | 4065.1               | 3382.2    | 9703.9                | 9973.6    | 603.8                | 143.2     |
| MIMAT0000084                  | 16197.8              | 14529.1   | 5981.2                | 6957.8    | 1811.5               | 214.7     |
| MIMAT0000085                  | 275.6                | 248.8     | 820.4                 | 1016.2    | 0.0                  | 0.0       |
| MIMAT0000086                  | 1570.4               | 1307.7    | 3734.2                | 6456.8    | 2113.5               | 1861.0    |
| MIMAT0000087                  | 3909.9               | 2861.6    | 5508.7                | 4021.2    | 452.9                | 0.0       |
| MIMAT0000088                  | 491.1                | 652.6     | 124.9                 | 64.9      | 754.8                | 0.0       |
| MIMAT0000090                  | 247.8                | 162.5     | 64.1                  | 0.0       | 0.0                  | 930.5     |
| MIMAT0000092                  | 23864.8              | 24205.8   | 37890.9               | 42738.0   | 8906.7               | 23548.9   |
| MIMAT0000092_1                | 22449.5              | 23246.0   | 35166.6               | 38624.4   | 9812.5               | 24407.8   |

|                       |          |          |         |         |        |        |
|-----------------------|----------|----------|---------|---------|--------|--------|
| <b>MIMAT0000093</b>   | 870.9    | 716.0    | 4627.0  | 7978.6  | 5434.6 | 5225.1 |
| <b>MIMAT0000094</b>   | 136.7    | 17.8     | 48.2    | 0.0     | 0.0    | 0.0    |
| <b>MIMAT0000095</b>   | 57.9     | 0.0      | 112.4   | 168.9   | 0.0    | 0.0    |
| <b>MIMAT0000096</b>   | 1556.5   | 1912.0   | 2804.8  | 4320.4  | 1660.6 | 715.8  |
| <b>MIMAT0000097</b>   | 28335.2  | 29616.8  | 1687.4  | 2487.9  | 0.0    | 0.0    |
| <b>MIMAT0000098</b>   | 6620.0   | 6441.9   | 684.5   | 1.7     | 0.0    | 0.0    |
| <b>MIMAT0000099</b>   | 9191.0   | 9653.9   | 2550.6  | 3121.0  | 905.8  | 214.7  |
| <b>MIMAT0000099_1</b> | 9612.6   | 10568.0  | 2581.8  | 2984.8  | 603.8  | 429.5  |
| <b>MIMAT0000100</b>   | 30.1     | 2.5      | 268.8   | 454.4   | 2415.4 | 3793.6 |
| <b>MIMAT0000100_1</b> | 18.5     | 0.0      | 249.8   | 420.5   | 2566.3 | 3364.1 |
| <b>MIMAT0000101</b>   | 1028.4   | 774.4    | 3033.2  | 2398.9  | 0.0    | 0.0    |
| <b>MIMAT0000101_1</b> | 1109.5   | 703.3    | 2875.7  | 2337.4  | 0.0    | 0.0    |
| <b>MIMAT0000104</b>   | 180.7    | 66.0     | 320.7   | 153.4   | 0.0    | 0.0    |
| <b>MIMAT0000222</b>   | 12721.1  | 11489.7  | 1084.0  | 748.5   | 1509.6 | 357.9  |
| <b>MIMAT0000227</b>   | 379.9    | 322.5    | 1823.8  | 1760.1  | 754.8  | 2719.9 |
| <b>MIMAT0000231</b>   | 1894.7   | 1406.7   | 388.5   | 198.2   | 452.9  | 0.0    |
| <b>MIMAT0000231_1</b> | 1836.8   | 1322.9   | 397.1   | 176.4   | 301.9  | 0.0    |
| <b>MIMAT0000232</b>   | 322.0    | 286.9    | 1885.3  | 1466.6  | 0.0    | 143.2  |
| <b>MIMAT0000232_1</b> | 296.5    | 281.8    | 1879.3  | 1457.4  | 452.9  | 214.7  |
| <b>MIMAT0000242_1</b> | 85.7     | 33.0     | 0.0     | 0.0     | 0.0    | 0.0    |
| <b>MIMAT0000243</b>   | 321547.7 | 360489.9 | 3939.9  | 2659.7  | 0.0    | 0.0    |
| <b>MIMAT0000244</b>   | 690.3    | 553.5    | 1248.5  | 960.5   | 0.0    | 1073.7 |
| <b>MIMAT0000244_1</b> | 704.2    | 604.3    | 1214.1  | 888.1   | 0.0    | 787.3  |
| <b>MIMAT0000245</b>   | 137636.4 | 142058.5 | 52009.5 | 56214.1 | 754.8  | 0.0    |
| <b>MIMAT0000250</b>   | 1362.0   | 1561.6   | 806.5   | 735.3   | 0.0    | 357.9  |
| <b>MIMAT0000252</b>   | 854.7    | 700.8    | 238.6   | 426.8   | 0.0    | 0.0    |
| <b>MIMAT0000252_1</b> | 910.3    | 721.1    | 238.9   | 430.8   | 0.0    | 0.0    |
| <b>MIMAT0000252_2</b> | 942.7    | 713.5    | 236.0   | 436.6   | 0.0    | 0.0    |
| <b>MIMAT0000253</b>   | 45304.4  | 55247.1  | 5628.4  | 6087.5  | 0.0    | 0.0    |
| <b>MIMAT0000254</b>   | 61926.1  | 77937.0  | 6771.6  | 9017.7  | 0.0    | 143.2  |
| <b>MIMAT0000255</b>   | 0.0      | 0.0      | 65.7    | 52.3    | 0.0    | 0.0    |
| <b>MIMAT0000256</b>   | 3092.3   | 2303.0   | 1188.6  | 1721.1  | 0.0    | 0.0    |
| <b>MIMAT0000256_1</b> | 2964.9   | 2460.4   | 1184.7  | 1727.4  | 0.0    | 0.0    |
| <b>MIMAT0000257</b>   | 530.4    | 335.2    | 134.8   | 183.8   | 0.0    | 0.0    |
| <b>MIMAT0000257_1</b> | 460.9    | 388.5    | 124.9   | 170.0   | 0.0    | 0.0    |
| <b>MIMAT0000259</b>   | 2652.2   | 3460.9   | 1751.3  | 3446.1  | 0.0    | 0.0    |
| <b>MIMAT0000261</b>   | 3020.4   | 4740.6   | 619.3   | 1023.1  | 1660.6 | 357.9  |
| <b>MIMAT0000264</b>   | 53.3     | 0.0      | 49.8    | 0.0     | 0.0    | 0.0    |
| <b>MIMAT0000265</b>   | 74.1     | 66.0     | 0.0     | 0.0     | 0.0    | 0.0    |
| <b>MIMAT0000271</b>   | 20.8     | 116.8    | 36.2    | 0.0     | 0.0    | 71.6   |
| <b>MIMAT0000272</b>   | 2413.6   | 2455.4   | 904.3   | 457.8   | 0.0    | 0.0    |

|                       |           |           |          |          |         |          |
|-----------------------|-----------|-----------|----------|----------|---------|----------|
| <b>MIMAT0000278</b>   | 5600.8    | 2595.0    | 3030.4   | 1785.4   | 3170.2  | 357.9    |
| <b>MIMAT0000279</b>   | 8588.8    | 8602.7    | 1646.5   | 1705.0   | 603.8   | 715.8    |
| <b>MIMAT0000280</b>   | 576.8     | 358.0     | 12257.6  | 12464.4  | 43929.8 | 67712.0  |
| <b>MIMAT0000281</b>   | 5285.8    | 5657.3    | 1551.6   | 580.8    | 452.9   | 143.2    |
| <b>MIMAT0000318</b>   | 111.2     | 71.1      | 127.5    | 0.0      | 0.0     | 0.0      |
| <b>MIMAT0000414</b>   | 23174.5   | 19995.9   | 39860.7  | 47158.4  | 14039.4 | 12239.7  |
| <b>MIMAT0000415</b>   | 151557.3  | 144879.5  | 17704.7  | 22014.7  | 8755.8  | 5511.4   |
| <b>MIMAT0000416</b>   | 416.9     | 228.5     | 743.2    | 931.8    | 0.0     | 930.5    |
| <b>MIMAT0000416_1</b> | 421.6     | 243.8     | 653.2    | 938.7    | 452.9   | 1145.2   |
| <b>MIMAT0000417</b>   | 85.7      | 40.6      | 3718.0   | 3270.9   | 452.9   | 572.6    |
| <b>MIMAT0000418</b>   | 187.6     | 78.7      | 1099.1   | 1788.3   | 2868.3  | 8589.3   |
| <b>MIMAT0000419</b>   | 17754.4   | 17611.6   | 10260.1  | 9037.8   | 0.0     | 1145.2   |
| <b>MIMAT0000420</b>   | 60.2      | 10.2      | 276.7    | 248.2    | 603.8   | 0.0      |
| <b>MIMAT0000421</b>   | 1314537.7 | 1453863.0 | 138996.8 | 158159.1 | 29739.4 | 48171.4  |
| <b>MIMAT0000423</b>   | 664.8     | 815.1     | 606.5    | 514.1    | 0.0     | 214.7    |
| <b>MIMAT0000423_1</b> | 750.5     | 787.1     | 618.8    | 530.8    | 0.0     | 143.2    |
| <b>MIMAT0000424</b>   | 24411.4   | 30089.1   | 1370.1   | 2349.5   | 0.0     | 71.6     |
| <b>MIMAT0000424_1</b> | 14859.0   | 16898.1   | 927.3    | 1307.5   | 0.0     | 0.0      |
| <b>MIMAT0000425</b>   | 69.5      | 68.6      | 37.6     | 0.0      | 13737.5 | 3650.4   |
| <b>MIMAT0000426</b>   | 16.2      | 63.5      | 136.6    | 0.0      | 0.0     | 0.0      |
| <b>MIMAT0000427</b>   | 0.0       | 0.0       | 0.0      | 84.4     | 0.0     | 0.0      |
| <b>MIMAT0000427_1</b> | 0.0       | 0.0       | 0.0      | 85.6     | 0.0     | 0.0      |
| <b>MIMAT0000431</b>   | 101.9     | 86.3      | 145.5    | 0.0      | 0.0     | 0.0      |
| <b>MIMAT0000432</b>   | 4.6       | 0.0       | 47.7     | 0.0      | 0.0     | 0.0      |
| <b>MIMAT0000433</b>   | 10416.4   | 11238.3   | 6038.6   | 9689.3   | 15549.0 | 5654.6   |
| <b>MIMAT0000434</b>   | 555.9     | 464.7     | 341.9    | 449.2    | 7850.0  | 3364.1   |
| <b>MIMAT0000435</b>   | 23105.0   | 23378.1   | 11082.8  | 11873.3  | 301.9   | 572.6    |
| <b>MIMAT0000436</b>   | 945.0     | 799.8     | 1080.1   | 1033.4   | 10869.2 | 715.8    |
| <b>MIMAT0000437</b>   | 0.0       | 0.0       | 289.2    | 0.0      | 754.8   | 787.3    |
| <b>MIMAT0000438</b>   | 1948.0    | 1223.9    | 190.4    | 175.2    | 0.0     | 0.0      |
| <b>MIMAT0000440</b>   | 8584.2    | 7391.5    | 15001.9  | 15461.9  | 18568.3 | 12382.8  |
| <b>MIMAT0000442</b>   | 2.3       | 0.0       | 0.0      | 182.7    | 0.0     | 0.0      |
| <b>MIMAT0000442_1</b> | 2.3       | 0.0       | 0.0      | 168.9    | 0.0     | 0.0      |
| <b>MIMAT0000442_2</b> | 4.6       | 0.0       | 0.0      | 170.6    | 0.0     | 0.0      |
| <b>MIMAT0000443</b>   | 5327.5    | 8389.4    | 3354.8   | 2528.2   | 905.8   | 1503.1   |
| <b>MIMAT0000444</b>   | 1714.1    | 1868.8    | 3805.4   | 2856.7   | 74273.0 | 287597.0 |
| <b>MIMAT0000445</b>   | 48412.8   | 45631.3   | 12224.7  | 20177.6  | 9661.5  | 6298.8   |
| <b>MIMAT0000446</b>   | 528.1     | 840.5     | 0.0      | 0.0      | 0.0     | 0.0      |
| <b>MIMAT0000447</b>   | 6529.6    | 5383.0    | 476.7    | 161.4    | 301.9   | 787.3    |
| <b>MIMAT0000449</b>   | 23702.6   | 18645.1   | 28003.7  | 27081.9  | 18568.3 | 23405.7  |
| <b>MIMAT0000451</b>   | 956.6     | 441.8     | 3308.1   | 4322.2   | 17813.4 | 53682.9  |

|                       |         |         |         |         |        |         |
|-----------------------|---------|---------|---------|---------|--------|---------|
| <b>MIMAT0000453</b>   | 0.0     | 0.0     | 98.6    | 0.0     | 0.0    | 0.0     |
| <b>MIMAT0000454</b>   | 27.8    | 233.6   | 0.0     | 0.0     | 0.0    | 0.0     |
| <b>MIMAT0000455</b>   | 5735.1  | 2983.5  | 3435.9  | 6293.7  | 3321.2 | 1145.2  |
| <b>MIMAT0000456</b>   | 2717.0  | 1404.2  | 2935.7  | 2654.0  | 2264.4 | 1646.3  |
| <b>MIMAT0000460</b>   | 595.3   | 586.5   | 312.4   | 413.0   | 151.0  | 214.7   |
| <b>MIMAT0000460_1</b> | 484.1   | 520.5   | 558.0   | 411.3   | 452.9  | 0.0     |
| <b>MIMAT0000461</b>   | 25.5    | 58.4    | 64.9    | 0.0     | 151.0  | 0.0     |
| <b>MIMAT0000462</b>   | 157.5   | 210.8   | 0.0     | 197.6   | 0.0    | 357.9   |
| <b>MIMAT0000510</b>   | 46837.8 | 21384.8 | 14197.4 | 8556.5  | 151.0  | 858.9   |
| <b>MIMAT0000617</b>   | 127.4   | 101.6   | 137.2   | 0.0     | 0.0    | 0.0     |
| <b>MIMAT0000646</b>   | 741.2   | 530.7   | 332.0   | 373.4   | 0.0    | 0.0     |
| <b>MIMAT0000680</b>   | 118.1   | 119.3   | 625.3   | 348.7   | 0.0    | 0.0     |
| <b>MIMAT0000681</b>   | 32.4    | 96.5    | 518.4   | 619.8   | 1207.7 | 858.9   |
| <b>MIMAT0000682</b>   | 539.7   | 248.8   | 0.0     | 0.0     | 0.0    | 0.0     |
| <b>MIMAT0000688</b>   | 0.0     | 0.0     | 25.3    | 0.0     | 603.8  | 143.2   |
| <b>MIMAT0000689</b>   | 5390.0  | 6459.6  | 789.1   | 524.5   | 0.0    | 0.0     |
| <b>MIMAT0000691</b>   | 30.1    | 35.5    | 147.1   | 0.0     | 603.8  | 357.9   |
| <b>MIMAT0000692</b>   | 11498.1 | 6881.1  | 19926.9 | 26585.6 | 0.0    | 71.6    |
| <b>MIMAT0000693</b>   | 3495.3  | 3839.2  | 540.0   | 0.0     | 1962.5 | 357.9   |
| <b>MIMAT0000703</b>   | 88.0    | 116.8   | 691.3   | 842.1   | 151.0  | 0.0     |
| <b>MIMAT0000707</b>   | 2358.0  | 2440.1  | 668.6   | 923.7   | 151.0  | 0.0     |
| <b>MIMAT0000720</b>   | 4.6     | 0.0     | 20.1    | 0.0     | 0.0    | 858.9   |
| <b>MIMAT0000721</b>   | 115.8   | 30.5    | 1896.6  | 2228.9  | 0.0    | 214.7   |
| <b>MIMAT0000722</b>   | 148.2   | 119.3   | 0.0     | 158.0   | 0.0    | 0.0     |
| <b>MIMAT0000727</b>   | 169.1   | 157.4   | 597.2   | 492.9   | 603.8  | 0.0     |
| <b>MIMAT0000728</b>   | 3233.5  | 4273.4  | 885.6   | 968.5   | 301.9  | 0.0     |
| <b>MIMAT0000729</b>   | 9.3     | 0.0     | 103.5   | 0.0     | 151.0  | 429.5   |
| <b>MIMAT0000729_1</b> | 30.1    | 0.0     | 87.9    | 0.0     | 0.0    | 214.7   |
| <b>MIMAT0000732</b>   | 2812.0  | 2800.7  | 77.2    | 143.0   | 301.9  | 0.0     |
| <b>MIMAT0000733</b>   | 593.0   | 454.5   | 99.6    | 384.9   | 0.0    | 0.0     |
| <b>MIMAT0000736</b>   | 1637.6  | 1505.7  | 37.3    | 181.5   | 0.0    | 0.0     |
| <b>MIMAT0000737</b>   | 3534.7  | 3813.8  | 2760.5  | 4922.5  | 1811.5 | 1503.1  |
| <b>MIMAT0000750</b>   | 335.9   | 269.2   | 179.9   | 446.3   | 754.8  | 787.3   |
| <b>MIMAT0000751</b>   | 1040.0  | 601.8   | 259.5   | 283.2   | 0.0    | 143.2   |
| <b>MIMAT0000752</b>   | 3604.2  | 4288.6  | 820.9   | 1495.3  | 1962.5 | 3077.8  |
| <b>MIMAT0000753</b>   | 150.6   | 0.0     | 1511.9  | 1573.4  | 5283.6 | 6585.1  |
| <b>MIMAT0000754</b>   | 11.6    | 0.0     | 33.6    | 116.0   | 151.0  | 214.7   |
| <b>MIMAT0000755</b>   | 108.9   | 33.0    | 133.5   | 0.0     | 0.0    | 0.0     |
| <b>MIMAT0000756</b>   | 57.9    | 2.5     | 147.1   | 209.1   | 1358.7 | 572.6   |
| <b>MIMAT0000757</b>   | 78473.7 | 86443.2 | 4832.3  | 5943.8  | 2717.3 | 10020.8 |
| <b>MIMAT0000759</b>   | 8164.9  | 7840.9  | 1579.2  | 2203.0  | 151.0  | 286.3   |



|                       |         |         |         |         |        |         |
|-----------------------|---------|---------|---------|---------|--------|---------|
| <b>MIMAT0000760</b>   | 60.2    | 0.0     | 188.8   | 0.0     | 0.0    | 71.6    |
| <b>MIMAT0000762</b>   | 0.0     | 0.0     | 25.6    | 0.0     | 0.0    | 0.0     |
| <b>MIMAT0000764</b>   | 55.6    | 96.5    | 103.0   | 0.0     | 0.0    | 0.0     |
| <b>MIMAT0000765</b>   | 233.9   | 246.3   | 7986.7  | 9940.9  | 2566.3 | 3507.3  |
| <b>MIMAT0000772</b>   | 67.2    | 142.2   | 170.3   | 418.8   | 151.0  | 71.6    |
| <b>MIMAT0001340</b>   | 17416.2 | 19731.8 | 7633.9  | 10677.9 | 301.9  | 501.0   |
| <b>MIMAT0001343</b>   | 210.8   | 134.6   | 62.8    | 0.0     | 0.0    | 0.0     |
| <b>MIMAT0001536</b>   | 48.6    | 20.3    | 27.1    | 0.0     | 0.0    | 0.0     |
| <b>MIMAT0001545</b>   | 37.1    | 0.0     | 39.1    | 0.0     | 0.0    | 0.0     |
| <b>MIMAT0001545_1</b> | 32.4    | 0.0     | 40.9    | 0.0     | 0.0    | 0.0     |
| <b>MIMAT0001618</b>   | 71.8    | 71.1    | 123.3   | 0.0     | 301.9  | 143.2   |
| <b>MIMAT0001621</b>   | 192.3   | 228.5   | 131.2   | 0.0     | 0.0    | 0.0     |
| <b>MIMAT0001629</b>   | 6.9     | 0.0     | 116.6   | 0.0     | 0.0    | 0.0     |
| <b>MIMAT0001629_1</b> | 2.3     | 0.0     | 117.6   | 0.0     | 0.0    | 0.0     |
| <b>MIMAT0001630</b>   | 9.3     | 0.0     | 0.3     | 553.2   | 0.0    | 0.0     |
| <b>MIMAT0001631</b>   | 38927.6 | 35853.0 | 36311.1 | 47680.0 | 6642.3 | 2648.4  |
| <b>MIMAT0001635</b>   | 85.7    | 86.3    | 276.2   | 0.0     | 0.0    | 0.0     |
| <b>MIMAT0001636</b>   | 30.1    | 0.0     | 44.9    | 0.0     | 0.0    | 0.0     |
| <b>MIMAT0001639</b>   | 34512.8 | 40431.1 | 4898.0  | 5745.1  | 2113.5 | 4366.2  |
| <b>MIMAT0002171</b>   | 104.2   | 0.0     | 38.1    | 0.0     | 0.0    | 0.0     |
| <b>MIMAT0002173</b>   | 37.1    | 109.2   | 285.0   | 107.4   | 1207.7 | 3149.4  |
| <b>MIMAT0002174</b>   | 1107.2  | 1376.2  | 2414.4  | 819.2   | 452.9  | 1431.5  |
| <b>MIMAT0002175</b>   | 2388.1  | 2419.8  | 531.7   | 318.2   | 0.0    | 0.0     |
| <b>MIMAT0002176</b>   | 958.9   | 2920.0  | 1252.2  | 1777.4  | 301.9  | 214.7   |
| <b>MIMAT0002177</b>   | 57302.8 | 83477.5 | 28584.1 | 27261.2 | 4679.8 | 13528.1 |
| <b>MIMAT0002177_1</b> | 63362.2 | 92697.2 | 28600.0 | 27322.6 | 6642.3 | 13098.6 |
| <b>MIMAT0002178</b>   | 48.6    | 0.0     | 88.7    | 526.2   | 0.0    | 0.0     |
| <b>MIMAT0002808</b>   | 289.5   | 134.6   | 0.0     | 0.0     | 452.9  | 0.0     |
| <b>MIMAT0002809</b>   | 14861.3 | 13480.4 | 1445.4  | 1236.8  | 1962.5 | 3507.3  |
| <b>MIMAT0002813</b>   | 90.3    | 48.2    | 84.2    | 0.0     | 0.0    | 0.0     |
| <b>MIMAT0002814</b>   | 213.1   | 157.4   | 71.2    | 0.0     | 0.0    | 0.0     |
| <b>MIMAT0002816</b>   | 25.5    | 0.0     | 451.9   | 868.6   | 0.0    | 0.0     |
| <b>MIMAT0002817</b>   | 755.1   | 634.8   | 502.2   | 1647.5  | 0.0    | 143.2   |
| <b>MIMAT0002818</b>   | 23.2    | 0.0     | 21.6    | 0.0     | 0.0    | 143.2   |
| <b>MIMAT0002821</b>   | 227.0   | 86.3    | 0.0     | 0.0     | 0.0    | 0.0     |
| <b>MIMAT0002859</b>   | 30.1    | 157.4   | 0.0     | 0.0     | 0.0    | 0.0     |
| <b>MIMAT0002859_1</b> | 30.1    | 129.5   | 0.0     | 0.0     | 0.0    | 0.0     |
| <b>MIMAT0002870</b>   | 178.4   | 137.1   | 115.3   | 172.3   | 0.0    | 0.0     |
| <b>MIMAT0002871</b>   | 55.6    | 10.2    | 165.6   | 123.5   | 0.0    | 0.0     |
| <b>MIMAT0002874</b>   | 18.5    | 129.5   | 0.0     | 199.9   | 0.0    | 0.0     |
| <b>MIMAT0002875</b>   | 0.0     | 0.0     | 47.7    | 0.0     | 0.0    | 0.0     |

|                       |         |         |         |         |         |          |
|-----------------------|---------|---------|---------|---------|---------|----------|
| <b>MIMAT0002876</b>   | 30.1    | 0.0     | 216.4   | 87.3    | 452.9   | 0.0      |
| <b>MIMAT0002888</b>   | 3770.9  | 3478.7  | 32.9    | 66.6    | 0.0     | 143.2    |
| <b>MIMAT0002891</b>   | 30.1    | 0.0     | 52.4    | 196.5   | 0.0     | 0.0      |
| <b>MIMAT0003161</b>   | 39.4    | 139.7   | 0.0     | 0.0     | 0.0     | 0.0      |
| <b>MIMAT0003180</b>   | 6.9     | 0.0     | 1147.9  | 841.0   | 0.0     | 357.9    |
| <b>MIMAT0003218</b>   | 484.1   | 942.0   | 388.3   | 0.0     | 0.0     | 357.9    |
| <b>MIMAT0003220</b>   | 11.6    | 0.0     | 103.0   | 455.0   | 0.0     | 0.0      |
| <b>MIMAT0003239</b>   | 0.0     | 58.4    | 578.1   | 701.4   | 1962.5  | 3292.5   |
| <b>MIMAT0003241</b>   | 39.4    | 0.0     | 87.4    | 0.0     | 452.9   | 0.0      |
| <b>MIMAT0003249</b>   | 6965.1  | 5504.9  | 1456.9  | 871.4   | 0.0     | 0.0      |
| <b>MIMAT0003251</b>   | 0.0     | 0.0     | 0.0     | 54.0    | 0.0     | 0.0      |
| <b>MIMAT0003251_1</b> | 0.0     | 0.0     | 0.0     | 54.0    | 0.0     | 0.0      |
| <b>MIMAT0003251_2</b> | 0.0     | 0.0     | 0.0     | 58.0    | 0.0     | 0.0      |
| <b>MIMAT0003266</b>   | 30.1    | 0.0     | 118.1   | 0.0     | 0.0     | 0.0      |
| <b>MIMAT0003283</b>   | 74.1    | 96.5    | 0.0     | 0.0     | 0.0     | 0.0      |
| <b>MIMAT0003297</b>   | 416.9   | 698.3   | 242.0   | 198.8   | 301.9   | 429.5    |
| <b>MIMAT0003321</b>   | 92.7    | 43.2    | 72.8    | 0.0     | 0.0     | 0.0      |
| <b>MIMAT0003322</b>   | 134.3   | 149.8   | 3307.3  | 3786.8  | 0.0     | 0.0      |
| <b>MIMAT0003329</b>   | 111.2   | 154.9   | 1.3     | 0.0     | 0.0     | 0.0      |
| <b>MIMAT0003330</b>   | 509.6   | 540.8   | 0.0     | 0.0     | 0.0     | 0.0      |
| <b>MIMAT0003332</b>   | 44.0    | 0.0     | 175.5   | 286.7   | 0.0     | 1073.7   |
| <b>MIMAT0003338</b>   | 53.3    | 193.0   | 178.1   | 0.0     | 151.0   | 501.0    |
| <b>MIMAT0003339</b>   | 148.2   | 231.1   | 347.3   | 691.1   | 0.0     | 1288.4   |
| <b>MIMAT0003389</b>   | 20.8    | 63.5    | 56.8    | 0.0     | 0.0     | 0.0      |
| <b>MIMAT0003393</b>   | 549.0   | 479.9   | 2585.2  | 2874.6  | 603.8   | 787.3    |
| <b>MIMAT0003884</b>   | 60.2    | 45.7    | 52.2    | 0.0     | 0.0     | 71.6     |
| <b>MIMAT0003885</b>   | 11.6    | 0.0     | 74.6    | 0.0     | 151.0   | 0.0      |
| <b>MIMAT0003886</b>   | 111.2   | 124.4   | 0.0     | 0.0     | 0.0     | 0.0      |
| <b>MIMAT0003888</b>   | 9.3     | 0.0     | 65.5    | 0.0     | 0.0     | 0.0      |
| <b>MIMAT0003945</b>   | 0.0     | 0.0     | 0.0     | 236.1   | 0.0     | 0.0      |
| <b>MIMAT0004481</b>   | 521.2   | 578.9   | 48.2    | 0.0     | 603.8   | 572.6    |
| <b>MIMAT0004481_1</b> | 437.8   | 571.3   | 48.0    | 0.0     | 905.8   | 1360.0   |
| <b>MIMAT0004482</b>   | 199.2   | 766.8   | 512.1   | 272.3   | 2415.4  | 9018.7   |
| <b>MIMAT0004484</b>   | 11822.4 | 25381.5 | 13493.6 | 16784.9 | 19172.1 | 130485.1 |
| <b>MIMAT0004485</b>   | 11.6    | 116.8   | 0.0     | 0.0     | 0.0     | 0.0      |
| <b>MIMAT0004486</b>   | 48.6    | 109.2   | 47.7    | 0.0     | 452.9   | 1717.9   |
| <b>MIMAT0004494</b>   | 20.8    | 0.0     | 114.7   | 184.4   | 0.0     | 143.2    |
| <b>MIMAT0004495</b>   | 393.8   | 386.0   | 18.3    | 725.5   | 151.0   | 0.0      |
| <b>MIMAT0004496</b>   | 9.3     | 83.8    | 123.6   | 0.0     | 0.0     | 357.9    |
| <b>MIMAT0004497</b>   | 120.4   | 167.6   | 0.0     | 0.0     | 0.0     | 286.3    |
| <b>MIMAT0004498</b>   | 85.7    | 38.1    | 0.0     | 287.8   | 0.0     | 0.0      |

|                     |        |        |        |        |        |        |
|---------------------|--------|--------|--------|--------|--------|--------|
| <b>MIMAT0004500</b> | 48.6   | 114.3  | 40.4   | 0.0    | 301.9  | 572.6  |
| <b>MIMAT0004501</b> | 108.9  | 116.8  | 0.0    | 0.0    | 0.0    | 0.0    |
| <b>MIMAT0004502</b> | 5529.0 | 5085.9 | 1422.0 | 263.7  | 603.8  | 286.3  |
| <b>MIMAT0004518</b> | 4486.7 | 4933.6 | 1241.8 | 1964.0 | 0.0    | 143.2  |
| <b>MIMAT0004549</b> | 233.9  | 286.9  | 0.0    | 0.0    | 0.0    | 0.0    |
| <b>MIMAT0004551</b> | 90.3   | 76.2   | 0.0    | 0.0    | 0.0    | 0.0    |
| <b>MIMAT0004552</b> | 845.4  | 1254.3 | 108.7  | 0.0    | 0.0    | 0.0    |
| <b>MIMAT0004556</b> | 104.2  | 81.3   | 44.3   | 0.0    | 2113.5 | 2863.1 |
| <b>MIMAT0004558</b> | 356.7  | 586.5  | 14.6   | 640.5  | 0.0    | 0.0    |
| <b>MIMAT0004563</b> | 322.0  | 233.6  | 1897.3 | 1487.3 | 151.0  | 143.2  |
| <b>MIMAT0004568</b> | 90.3   | 147.3  | 40.9   | 0.0    | 0.0    | 0.0    |
| <b>MIMAT0004570</b> | 5464.1 | 4303.9 | 162.5  | 1552.7 | 603.8  | 1073.7 |
| <b>MIMAT0004585</b> | 18.5   | 0.0    | 39.1   | 0.0    | 603.8  | 1789.4 |
| <b>MIMAT0004586</b> | 92.7   | 38.1   | 268.6  | 360.8  | 1358.7 | 858.9  |
| <b>MIMAT0004587</b> | 53.3   | 0.0    | 97.8   | 0.0    | 0.0    | 0.0    |
| <b>MIMAT0004589</b> | 48.6   | 121.9  | 0.0    | 0.0    | 0.0    | 0.0    |
| <b>MIMAT0004597</b> | 6881.7 | 6274.3 | 1398.0 | 1544.7 | 452.9  | 71.6   |
| <b>MIMAT0004600</b> | 690.3  | 289.5  | 2382.4 | 525.0  | 1056.7 | 858.9  |
| <b>MIMAT0004601</b> | 535.1  | 434.2  | 320.0  | 467.6  | 0.0    | 143.2  |
| <b>MIMAT0004602</b> | 118.1  | 30.5   | 0.0    | 0.0    | 0.0    | 0.0    |
| <b>MIMAT0004603</b> | 44.0   | 127.0  | 0.0    | 0.0    | 0.0    | 0.0    |
| <b>MIMAT0004606</b> | 20.8   | 0.0    | 43.0   | 0.0    | 0.0    | 0.0    |
| <b>MIMAT0004608</b> | 71.8   | 104.1  | 0.0    | 0.0    | 0.0    | 0.0    |
| <b>MIMAT0004610</b> | 525.8  | 515.4  | 102.0  | 194.7  | 0.0    | 715.8  |
| <b>MIMAT0004611</b> | 136.7  | 53.3   | 0.0    | 0.0    | 151.0  | 0.0    |
| <b>MIMAT0004614</b> | 829.2  | 782.1  | 462.1  | 0.0    | 0.0    | 0.0    |
| <b>MIMAT0004672</b> | 1535.7 | 1371.1 | 284.5  | 0.0    | 754.8  | 0.0    |
| <b>MIMAT0004674</b> | 27.8   | 0.0    | 21.4   | 0.0    | 0.0    | 0.0    |
| <b>MIMAT0004678</b> | 108.9  | 40.6   | 0.0    | 0.0    | 0.0    | 0.0    |
| <b>MIMAT0004680</b> | 945.0  | 1183.2 | 530.1  | 402.7  | 1207.7 | 858.9  |
| <b>MIMAT0004682</b> | 1711.7 | 1152.8 | 61.3   | 868.6  | 452.9  | 0.0    |
| <b>MIMAT0004683</b> | 0.0    | 0.0    | 58.9   | 377.4  | 151.0  | 0.0    |
| <b>MIMAT0004688</b> | 78.8   | 127.0  | 0.0    | 0.0    | 0.0    | 0.0    |
| <b>MIMAT0004690</b> | 41.7   | 0.0    | 16.9   | 0.0    | 0.0    | 0.0    |
| <b>MIMAT0004692</b> | 7710.9 | 8244.7 | 2077.0 | 4641.0 | 0.0    | 0.0    |
| <b>MIMAT0004694</b> | 1239.2 | 1241.7 | 119.4  | 0.0    | 0.0    | 787.3  |
| <b>MIMAT0004697</b> | 46.3   | 2.5    | 1627.2 | 1814.7 | 0.0    | 286.3  |
| <b>MIMAT0004699</b> | 53.3   | 0.0    | 93.1   | 0.0    | 0.0    | 0.0    |
| <b>MIMAT0004701</b> | 229.3  | 304.7  | 187.8  | 0.0    | 0.0    | 0.0    |
| <b>MIMAT0004702</b> | 426.2  | 302.2  | 708.5  | 329.7  | 0.0    | 0.0    |
| <b>MIMAT0004703</b> | 993.7  | 1069.0 | 474.1  | 1086.3 | 0.0    | 0.0    |

|                       |          |          |         |         |         |         |
|-----------------------|----------|----------|---------|---------|---------|---------|
| <b>MIMAT0004748</b>   | 211764.7 | 287940.9 | 42571.3 | 57079.8 | 23248.1 | 11237.6 |
| <b>MIMAT0004749</b>   | 252.5    | 274.2    | 210.7   | 0.0     | 0.0     | 0.0     |
| <b>MIMAT0004761</b>   | 1176.7   | 3374.5   | 1153.9  | 2370.2  | 301.9   | 0.0     |
| <b>MIMAT0004762</b>   | 354.4    | 391.0    | 362.5   | 572.7   | 0.0     | 0.0     |
| <b>MIMAT0004762_1</b> | 257.1    | 284.4    | 236.3   | 550.9   | 0.0     | 0.0     |
| <b>MIMAT0004766</b>   | 25.5     | 38.1     | 75.4    | 0.0     | 0.0     | 0.0     |
| <b>MIMAT0004767</b>   | 201.5    | 639.9    | 0.0     | 380.9   | 905.8   | 0.0     |
| <b>MIMAT0004774</b>   | 542.0    | 624.6    | 448.8   | 440.6   | 0.0     | 0.0     |
| <b>MIMAT0004775</b>   | 51.0     | 43.2     | 388.8   | 112.0   | 0.0     | 0.0     |
| <b>MIMAT0004776</b>   | 125.1    | 27.9     | 0.0     | 0.0     | 452.9   | 0.0     |
| <b>MIMAT0004780</b>   | 4.6      | 0.0      | 100.1   | 0.0     | 0.0     | 143.2   |
| <b>MIMAT0004792</b>   | 90.3     | 144.7    | 0.0     | 0.0     | 0.0     | 0.0     |
| <b>MIMAT0004793</b>   | 0.0      | 0.0      | 0.0     | 0.0     | 2868.3  | 3936.7  |
| <b>MIMAT0004795</b>   | 0.0      | 0.0      | 25.0    | 0.0     | 0.0     | 0.0     |
| <b>MIMAT0004796</b>   | 41.7     | 68.6     | 32.3    | 0.0     | 0.0     | 0.0     |
| <b>MIMAT0004797</b>   | 37.1     | 139.7    | 0.0     | 0.0     | 0.0     | 0.0     |
| <b>MIMAT0004799</b>   | 108.9    | 35.5     | 0.0     | 0.0     | 0.0     | 0.0     |
| <b>MIMAT0004801</b>   | 34.7     | 0.0      | 0.0     | 63.2    | 0.0     | 644.2   |
| <b>MIMAT0004808</b>   | 1223.0   | 1279.7   | 774.5   | 704.9   | 2264.4  | 2004.2  |
| <b>MIMAT0004809</b>   | 4.6      | 27.9     | 125.2   | 0.0     | 0.0     | 143.2   |
| <b>MIMAT0004810</b>   | 1690.9   | 1399.1   | 183.6   | 223.5   | 452.9   | 71.6    |
| <b>MIMAT0004813</b>   | 78.8     | 177.7    | 52.9    | 0.0     | 0.0     | 0.0     |
| <b>MIMAT0004814</b>   | 555.9    | 299.6    | 55.0    | 418.8   | 0.0     | 71.6    |
| <b>MIMAT0004819</b>   | 731.9    | 840.5    | 31.3    | 0.0     | 0.0     | 0.0     |
| <b>MIMAT0004909</b>   | 44.0     | 63.5     | 120.0   | 0.6     | 0.0     | 0.0     |
| <b>MIMAT0004921</b>   | 308.1    | 477.4    | 59.2    | 49.4    | 0.0     | 0.0     |
| <b>MIMAT0004945</b>   | 7852.2   | 7053.8   | 236.3   | 970.8   | 1056.7  | 286.3   |
| <b>MIMAT0004947</b>   | 34.7     | 175.2    | 970.6   | 726.1   | 0.0     | 2863.1  |
| <b>MIMAT0004948</b>   | 60.2     | 33.0     | 42.2    | 0.0     | 0.0     | 0.0     |
| <b>MIMAT0004949</b>   | 37.1     | 73.6     | 87.4    | 195.9   | 301.9   | 71.6    |
| <b>MIMAT0004954</b>   | 10448.8  | 13673.4  | 1012.6  | 1013.3  | 301.9   | 286.3   |
| <b>MIMAT0004955</b>   | 48.6     | 134.6    | 255.6   | 0.0     | 1056.7  | 3221.0  |
| <b>MIMAT0004957</b>   | 264.1    | 307.2    | 77.7    | 463.0   | 0.0     | 0.0     |
| <b>MIMAT0004959</b>   | 18.5     | 0.0      | 41.2    | 0.0     | 0.0     | 0.0     |
| <b>MIMAT0004984</b>   | 134.3    | 180.3    | 0.0     | 0.0     | 0.0     | 0.0     |
| <b>MIMAT0004984_1</b> | 148.2    | 167.6    | 0.0     | 0.0     | 0.0     | 0.0     |
| <b>MIMAT0004984_2</b> | 127.4    | 180.3    | 0.0     | 0.0     | 0.0     | 0.0     |
| <b>MIMAT0004984_3</b> | 143.6    | 167.6    | 0.0     | 0.0     | 0.0     | 0.0     |
| <b>MIMAT0004984_4</b> | 180.7    | 180.3    | 0.0     | 0.0     | 0.0     | 0.0     |
| <b>MIMAT0004985</b>   | 115.8    | 294.5    | 265.7   | 0.0     | 0.0     | 0.0     |
| <b>MIMAT0005577</b>   | 0.0      | 0.0      | 43.5    | 0.0     | 0.0     | 0.0     |

|                       |        |        |        |        |        |        |
|-----------------------|--------|--------|--------|--------|--------|--------|
| <b>MIMAT0005582</b>   | 97.3   | 116.8  | 0.0    | 0.0    | 0.0    | 0.0    |
| <b>MIMAT0005583</b>   | 0.0    | 0.0    | 0.0    | 159.1  | 0.0    | 0.0    |
| <b>MIMAT0005584</b>   | 0.0    | 99.0   | 0.0    | 0.0    | 754.8  | 1861.0 |
| <b>MIMAT0005593</b>   | 11.6   | 0.0    | 36.0   | 0.0    | 0.0    | 0.0    |
| <b>MIMAT0005792</b>   | 1857.7 | 1277.2 | 340.8  | 264.2  | 0.0    | 71.6   |
| <b>MIMAT0005792_1</b> | 1697.8 | 1081.7 | 347.9  | 279.8  | 151.0  | 71.6   |
| <b>MIMAT0005793</b>   | 711.1  | 617.0  | 166.9  | 94.2   | 0.0    | 0.0    |
| <b>MIMAT0005793_1</b> | 715.7  | 540.8  | 207.6  | 96.5   | 0.0    | 0.0    |
| <b>MIMAT0005797</b>   | 576.8  | 812.5  | 304.3  | 23.0   | 151.0  | 0.0    |
| <b>MIMAT0005825</b>   | 201.5  | 134.6  | 0.0    | 0.0    | 0.0    | 0.0    |
| <b>MIMAT0005874</b>   | 48.6   | 99.0   | 78.8   | 0.0    | 0.0    | 0.0    |
| <b>MIMAT0005875</b>   | 51.0   | 81.3   | 0.0    | 258.5  | 0.0    | 0.0    |
| <b>MIMAT0005882</b>   | 20.8   | 0.0    | 92.6   | 0.0    | 0.0    | 0.0    |
| <b>MIMAT0005884</b>   | 27.8   | 0.0    | 0.0    | 164.9  | 0.0    | 0.0    |
| <b>MIMAT0005892</b>   | 46.3   | 50.8   | 143.4  | 0.0    | 0.0    | 0.0    |
| <b>MIMAT0005898</b>   | 120.4  | 121.9  | 0.0    | 0.0    | 1207.7 | 644.2  |
| <b>MIMAT0005901</b>   | 13.9   | 22.9   | 366.9  | 649.1  | 0.0    | 0.0    |
| <b>MIMAT0005911</b>   | 16.2   | 38.1   | 633.4  | 1223.6 | 603.8  | 357.9  |
| <b>MIMAT0005919</b>   | 90.3   | 121.9  | 0.0    | 0.0    | 0.0    | 0.0    |
| <b>MIMAT0005919_1</b> | 85.7   | 129.5  | 0.0    | 0.0    | 0.0    | 0.0    |
| <b>MIMAT0005933</b>   | 0.0    | 0.0    | 88.4   | 0.0    | 0.0    | 0.0    |
| <b>MIMAT0005948</b>   | 613.8  | 589.1  | 418.5  | 0.0    | 301.9  | 0.0    |
| <b>MIMAT0005949</b>   | 0.0    | 0.0    | 197.9  | 0.0    | 2717.3 | 4079.9 |
| <b>MIMAT0005950</b>   | 9.3    | 7.6    | 91.3   | 0.0    | 0.0    | 0.0    |
| <b>MIMAT0005951</b>   | 3493.0 | 3143.5 | 130.1  | 0.0    | 0.0    | 0.0    |
| <b>MIMAT0006764</b>   | 150.6  | 157.4  | 89.2   | 48.8   | 0.0    | 0.0    |
| <b>MIMAT0006764_1</b> | 122.8  | 114.3  | 84.5   | 36.8   | 0.0    | 0.0    |
| <b>MIMAT0006789</b>   | 206.2  | 114.3  | 37.8   | 0.0    | 301.9  | 0.0    |
| <b>MIMAT0007881</b>   | 275.6  | 370.7  | 120.2  | 0.0    | 0.0    | 143.2  |
| <b>MIMAT0007883</b>   | 0.0    | 0.0    | 28.9   | 0.0    | 0.0    | 0.0    |
| <b>MIMAT0010133</b>   | 423.9  | 246.3  | 100.1  | 0.0    | 0.0    | 0.0    |
| <b>MIMAT0010214</b>   | 9.3    | 15.2   | 92.3   | 68.4   | 0.0    | 0.0    |
| <b>MIMAT0011161</b>   | 0.0    | 0.0    | 43.8   | 0.0    | 0.0    | 0.0    |
| <b>MIMAT0011778</b>   | 0.0    | 0.0    | 18.0   | 0.0    | 0.0    | 0.0    |
| <b>MIMAT0014982</b>   | 150.6  | 55.9   | 55.5   | 0.0    | 0.0    | 0.0    |
| <b>MIMAT0015004</b>   | 23.2   | 0.0    | 0.3    | 339.5  | 0.0    | 0.0    |
| <b>MIMAT0015006</b>   | 162.1  | 317.4  | 0.0    | 0.0    | 0.0    | 0.0    |
| <b>MIMAT0015032</b>   | 104.2  | 53.3   | 0.0    | 0.0    | 0.0    | 0.0    |
| <b>MIMAT0015032_1</b> | 141.3  | 53.3   | 0.0    | 0.0    | 0.0    | 0.0    |
| <b>MIMAT0015041</b>   | 16.2   | 33.0   | 1235.0 | 1826.2 | 5585.6 | 3650.4 |
| <b>MIMAT0015043</b>   | 90.3   | 601.8  | 0.0    | 0.0    | 0.0    | 0.0    |

|                       |        |        |        |        |        |        |
|-----------------------|--------|--------|--------|--------|--------|--------|
| <b>MIMAT0015050</b>   | 2290.8 | 2823.5 | 782.8  | 782.4  | 754.8  | 429.5  |
| <b>MIMAT0015054</b>   | 32.4   | 129.5  | 92.3   | 0.0    | 0.0    | 0.0    |
| <b>MIMAT0016847</b>   | 71.8   | 53.3   | 2.1    | 0.0    | 0.0    | 0.0    |
| <b>MIMAT0016916</b>   | 0.0    | 0.0    | 35.7   | 0.0    | 0.0    | 0.0    |
| <b>MIMAT0017981</b>   | 57.9   | 104.1  | 0.0    | 0.0    | 0.0    | 0.0    |
| <b>MIMAT0017982</b>   | 104.2  | 195.5  | 0.0    | 0.0    | 0.0    | 143.2  |
| <b>MIMAT0017988</b>   | 16.2   | 0.0    | 38.9   | 0.0    | 0.0    | 0.0    |
| <b>MIMAT0017990</b>   | 69.5   | 73.6   | 1298.4 | 1597.0 | 0.0    | 0.0    |
| <b>MIMAT0017994</b>   | 2230.6 | 2272.5 | 322.6  | 273.4  | 0.0    | 143.2  |
| <b>MIMAT0017997</b>   | 13.9   | 0.0    | 24.0   | 0.6    | 0.0    | 0.0    |
| <b>MIMAT0018104</b>   | 39.4   | 307.2  | 0.0    | 367.6  | 0.0    | 0.0    |
| <b>MIMAT0018195</b>   | 2.3    | 0.0    | 24.8   | 0.0    | 0.0    | 0.0    |
| <b>MIMAT0018205</b>   | 18.5   | 0.0    | 96.5   | 0.0    | 0.0    | 0.0    |
| <b>MIMAT0018356</b>   | 0.0    | 0.0    | 0.3    | 253.9  | 0.0    | 0.0    |
| <b>MIMAT0018926</b>   | 11.6   | 33.0   | 31.0   | 0.0    | 0.0    | 0.0    |
| <b>MIMAT0018926_1</b> | 27.8   | 20.3   | 39.1   | 0.0    | 0.0    | 0.0    |
| <b>MIMAT0018965</b>   | 1285.5 | 952.2  | 351.5  | 465.3  | 301.9  | 71.6   |
| <b>MIMAT0019048</b>   | 0.0    | 60.9   | 77.7   | 0.0    | 0.0    | 0.0    |
| <b>MIMAT0019074</b>   | 104.2  | 78.7   | 0.3    | 0.0    | 0.0    | 0.0    |
| <b>MIMAT0019198</b>   | 39.4   | 86.3   | 0.0    | 0.0    | 0.0    | 0.0    |
| <b>MIMAT0019214</b>   | 13.9   | 0.0    | 66.5   | 0.0    | 0.0    | 0.0    |
| <b>MIMAT0019734</b>   | 44.0   | 0.0    | 71.7   | 0.0    | 0.0    | 0.0    |
| <b>MIMAT0019739</b>   | 78.8   | 93.9   | 225.0  | 0.0    | 0.0    | 0.0    |
| <b>MIMAT0019772</b>   | 0.0    | 96.5   | 20.1   | 0.0    | 0.0    | 0.0    |
| <b>MIMAT0019855</b>   | 69.5   | 25.4   | 0.0    | 442.9  | 0.0    | 0.0    |
| <b>MIMAT0019856</b>   | 25.5   | 0.0    | 63.1   | 0.0    | 0.0    | 0.0    |
| <b>MIMAT0019880</b>   | 99.6   | 116.8  | 0.0    | 0.0    | 0.0    | 0.0    |
| <b>MIMAT0019892</b>   | 11.6   | 0.0    | 51.4   | 0.0    | 0.0    | 0.0    |
| <b>MIMAT0020924</b>   | 55.6   | 71.1   | 0.0    | 0.0    | 0.0    | 143.2  |
| <b>MIMAT0021120</b>   | 44.0   | 104.1  | 0.0    | 1.7    | 0.0    | 0.0    |
| <b>MIMAT0022697</b>   | 220.0  | 162.5  | 616.5  | 1001.8 | 0.0    | 429.5  |
| <b>MIMAT0022700</b>   | 0.0    | 0.0    | 92.1   | 0.0    | 0.0    | 0.0    |
| <b>MIMAT0022714</b>   | 141.3  | 190.4  | 0.0    | 0.0    | 452.9  | 0.0    |
| <b>MIMAT0022720</b>   | 57.9   | 50.8   | 87.4   | 0.0    | 0.0    | 0.0    |
| <b>MIMAT0022726</b>   | 41.7   | 0.0    | 307.7  | 356.7  | 452.9  | 1360.0 |
| <b>MIMAT0022727</b>   | 132.0  | 22.9   | 98.8   | 0.0    | 0.0    | 0.0    |
| <b>MIMAT0022842</b>   | 27.8   | 0.0    | 54.0   | 227.5  | 3623.1 | 9090.3 |
| <b>MIMAT0025479</b>   | 0.0    | 0.0    | 3.1    | 33.9   | 0.0    | 286.3  |
| <b>MIMAT0025479_1</b> | 0.0    | 0.0    | 2.9    | 36.8   | 0.0    | 214.7  |
| <b>MIMAT0025479_2</b> | 0.0    | 0.0    | 5.0    | 29.9   | 0.0    | 214.7  |
| <b>MIMAT0025479_3</b> | 0.0    | 0.0    | 8.3    | 50.6   | 0.0    | 357.9  |

|                       |        |         |         |         |         |         |
|-----------------------|--------|---------|---------|---------|---------|---------|
| <b>MIMAT0025483</b>   | 18.5   | 48.2    | 73.0    | 0.0     | 0.0     | 0.0     |
| <b>MIMAT0025848</b>   | 0.0    | 0.0     | 15.6    | 137.9   | 0.0     | 71.6    |
| <b>MIMAT0025848_1</b> | 0.0    | 0.0     | 13.3    | 121.8   | 0.0     | 214.7   |
| <b>MIMAT0026555</b>   | 0.0    | 0.0     | 44.3    | 0.0     | 0.0     | 0.0     |
| <b>MIMAT0026555_1</b> | 0.0    | 0.0     | 55.5    | 0.0     | 0.0     | 0.0     |
| <b>MIMAT0026559</b>   | 171.4  | 91.4    | 91.3    | 0.0     | 0.0     | 0.0     |
| <b>MIMAT0026606</b>   | 4.6    | 0.0     | 24.0    | 0.0     | 0.0     | 0.0     |
| <b>MIMAT0026721</b>   | 0.0    | 0.0     | 38.3    | 0.0     | 0.0     | 0.0     |
| <b>MIMAT0027032</b>   | 2.3    | 2.5     | 58.7    | 0.6     | 0.0     | 0.0     |
| <b>MIMAT0027366</b>   | 0.0    | 0.0     | 0.0     | 125.2   | 0.0     | 0.0     |
| <b>MIMAT0027369</b>   | 2.3    | 60.9    | 8.9     | 0.0     | 0.0     | 0.0     |
| <b>MIMAT0027384</b>   | 37.1   | 121.9   | 98.3    | 0.0     | 0.0     | 0.0     |
| <b>MIMAT0027395</b>   | 60.2   | 142.2   | 0.0     | 0.0     | 0.0     | 0.0     |
| <b>MIMAT0027507</b>   | 0.0    | 0.0     | 449.8   | 221.7   | 0.0     | 0.0     |
| <b>MIMAT0027518</b>   | 0.0    | 0.0     | 97.3    | 0.0     | 0.0     | 357.9   |
| <b>MIMAT0027530</b>   | 11.6   | 165.0   | 0.0     | 0.0     | 0.0     | 0.0     |
| <b>MIMAT0027539</b>   | 0.0    | 0.0     | 62.8    | 0.0     | 0.0     | 0.0     |
| <b>MIMAT0027587</b>   | 630.0  | 637.3   | 87.1    | 0.0     | 0.0     | 0.0     |
| <b>MIMAT0027588</b>   | 37.1   | 93.9    | 42.5    | 0.0     | 0.0     | 0.0     |
| <b>MIMAT0027604</b>   | 143.6  | 40.6    | 69.4    | 0.0     | 0.0     | 0.0     |
| <b>MIMAT0027617</b>   | 0.0    | 0.0     | 25.8    | 0.0     | 0.0     | 0.0     |
| <b>MIMAT0030021</b>   | 155.2  | 292.0   | 0.0     | 0.0     | 0.0     | 0.0     |
| <b>MIMAT0030413</b>   | 637.0  | 561.2   | 17060.3 | 24216.0 | 754.8   | 3722.0  |
| <b>MIMAT0030414</b>   | 3015.8 | 10232.8 | 1051.4  | 631.3   | 2566.3  | 3865.2  |
| <b>MIMAT0030428</b>   | 0.0    | 0.0     | 34.9    | 0.0     | 0.0     | 0.0     |
| <b>MIMAT0030999</b>   | 0.0    | 0.0     | 79.5    | 0.0     | 0.0     | 0.0     |
| <b>MIMAT0031180</b>   | 0.0    | 0.0     | 12.5    | 23.0    | 0.0     | 0.0     |
| <b>MIMAT0039763</b>   | 9.3    | 20.3    | 14.9    | 0.6     | 0.0     | 0.0     |
| <b>MIMAT0039764</b>   | 616.1  | 1000.4  | 117.1   | 0.0     | 0.0     | 0.0     |
| <b>MIMAT0041618</b>   | 0.0    | 0.0     | 42.5    | 0.0     | 0.0     | 0.0     |
| <b>MIMAT0041629</b>   | 53.3   | 38.1    | 34.9    | 259.7   | 0.0     | 0.0     |
| <b>MIMAT0041630</b>   | 57.9   | 246.3   | 25.0    | 0.0     | 0.0     | 0.0     |
| <b>MIMAT0041997</b>   | 20.8   | 0.0     | 28.7    | 0.0     | 0.0     | 0.0     |
| <b>MIMAT0044657</b>   | 129.7  | 190.4   | 0.0     | 0.0     | 0.0     | 0.0     |
| <b>MIMAT0044658</b>   | 208.5  | 162.5   | 0.0     | 0.0     | 0.0     | 0.0     |
| <b>MIMAT0049032</b>   | 0.0    | 0.0     | 102.2   | 0.6     | 24606.7 | 30778.2 |

<sup>a</sup> Accession number of miRNAs in miRbase (the microRNA database)  
(<https://www.mirbase.org/index.shtml>)

<sup>b</sup> NEBNext Multiplex Small RNA Library Prep Set for Illumina.

<sup>c</sup> NEXTFlex Small RNA-Seq Kit v3.

<sup>d</sup> SMARTer smRNA-seq kit.

**Table S3.** Number of reads that remain after each of the steps of different EVs isolation methods in the bioinformatics process obtained by the ultra-deep sequencing analysis.

| Isolation methods                          | Replica  | Initial reads | Post-trimming <sup>a</sup> | Too short <sup>b</sup> | Too long <sup>c</sup> | Aligned 0 times <sup>d</sup> | Aligned exactly 1 time <sup>e</sup> | Aligned >1 times <sup>f</sup> | No feature <sup>g</sup> | Final reads <sup>h</sup> |
|--------------------------------------------|----------|---------------|----------------------------|------------------------|-----------------------|------------------------------|-------------------------------------|-------------------------------|-------------------------|--------------------------|
| <b>Size exclusion chromatography (SEC)</b> | <b>1</b> | 52,212,398    | 14,869,057                 | 15,021,795             | 22,321,546            | 6,518,235                    | 643,691                             | 7,707,131                     | 8,120,100               | <b>230,722</b>           |
|                                            | <b>2</b> | 11,845,277    | 2,866,224                  | 6,138,591              | 2,840,462             | 1,962,382                    | 217,196                             | 686,646                       | 870,412                 | <b>33,430</b>            |
|                                            | <b>3</b> | 13,457,256    | 4,050,107                  | 7,021,869              | 2,385,280             | 2,612,502                    | 329,589                             | 1,108,016                     | 1,341,088               | <b>96,517</b>            |
| <b>Iodixanol gradients</b>                 | <b>1</b> | 22,927,102    | 5,503,171                  | 14,513,590             | 2,910,341             | 2,661,171                    | 763,814                             | 2,078,186                     | 1,831,390               | <b>1,010,610</b>         |
|                                            | <b>2</b> | 19,791,596    | 7,534,761                  | 8,199,092              | 4,057,743             | 3,536,190                    | 1,195,765                           | 2,802,806                     | 1,979,942               | <b>2,018,629</b>         |
|                                            | <b>3</b> | 14,796,045    | 5,223,574                  | 6,714,444              | 2,858,027             | 2,509,192                    | 812,122                             | 1,902,260                     | 1,484,901               | <b>1,229,481</b>         |
| <b>SEC + Iodixanol gradients</b>           | <b>1</b> | 20,277,248    | 7,604,405                  | 8,439,115              | 4,233,728             | 5,101,523                    | 480,885                             | 2,021,997                     | 2,383,242               | <b>119,640</b>           |
|                                            | <b>2</b> | 17,261,430    | 5,452,052                  | 8,571,717              | 3,237,661             | 3,726,289                    | 391,554                             | 1,334,209                     | 1,662,167               | <b>63,596</b>            |
|                                            | <b>3</b> | 22,873,867    | 7,761,546                  | 12,309,751             | 2,802,570             | 5,108,336                    | 650,194                             | 2,003,016                     | 2,523,274               | <b>129,936</b>           |

<sup>a</sup> Number of reads between 17 and 25 nucleotides after trimming according to kit manufacturer instructions.

<sup>b</sup> Number of reads discarded to be shorter than 17 nucleotides.

<sup>c</sup> Number of reads discarded to be longer than 25 nucleotides.

<sup>d</sup> Number of reads discarded because do not map to human reference genome (assembly hg38).

<sup>e</sup> Number of reads that map one time to human reference genome (assembly hg38).

<sup>f</sup> Number of reads that map more than one time to human reference genome (assembly hg38).

<sup>g</sup> Number of reads discarded because they do not map to miRNAs coordinates.

<sup>h</sup> Number of reads after each of the steps in the bioinformatics process.



**Table S4.** Normalized counts of miRNAs detected using three different EVs isolation methods and filtered by abundance (miRNAs with at least 50 reads).

| Accession Number <sup>a</sup> | SEC <sup>b</sup> |         |         | GRAD <sup>c</sup> |         |         | SEC + GRAD <sup>d</sup> |         |         |
|-------------------------------|------------------|---------|---------|-------------------|---------|---------|-------------------------|---------|---------|
|                               | R1               | R2      | R3      | R1                | R2      | R3      | R1                      | R2      | R3      |
| MIMAT0000062                  | 15754,4          | 6086,6  | 4868,5  | 10488,2           | 10738,7 | 10522,4 | 9542,1                  | 9454,2  | 10963,7 |
| MIMAT0000062_1                | 16424,7          | 6486,6  | 4956,3  | 10949,6           | 11003,6 | 10795,8 | 10158,6                 | 10181,5 | 11847,9 |
| MIMAT0000062_2                | 16151,2          | 6186,6  | 5229,1  | 10933,0           | 11042,5 | 10870,5 | 10132,6                 | 10058,9 | 11725,0 |
| MIMAT0000063                  | 189016,8         | 42643,9 | 59573,3 | 75981,4           | 78065,5 | 71599,1 | 76615,0                 | 74547,1 | 67494,9 |
| MIMAT0000064                  | 4091,2           | 662,4   | 1488,8  | 1406,0            | 1563,3  | 1534,5  | 1528,1                  | 1487,2  | 2125,3  |
| MIMAT0000065                  | 450,9            | 62,5    | 887,7   | 670,4             | 742,6   | 1077,5  | 655,5                   | 1168,5  | 1011,1  |
| MIMAT0000066                  | 998,0            | 562,4   | 1382,4  | 282,6             | 327,4   | 327,5   | 138,9                   | 416,7   | 392,6   |
| MIMAT0000067                  | 15378,7          | 7886,4  | 7901,5  | 14882,1           | 15146,2 | 14775,2 | 14981,8                 | 13025,1 | 13743,2 |
| MIMAT0000067_1                | 19731,3          | 10648,5 | 11540,2 | 18609,1           | 18973,3 | 19004,8 | 15619,9                 | 14994,4 | 16225,4 |
| MIMAT0000069                  | 90,2             | 225,0   | 0,0     | 234,5             | 214,7   | 246,6   | 464,5                   | 392,2   | 130,9   |
| MIMAT0000069_1                | 78,2             | 200,0   | 4,6     | 239,9             | 194,0   | 236,8   | 468,9                   | 424,9   | 91,2    |
| MIMAT0000070                  | 336,7            | 12,5    | 13,9    | 233,3             | 197,9   | 221,3   | 4,3                     | 0,0     | 646,3   |
| MIMAT0000072                  | 0,0              | 0,0     | 0,0     | 17,2              | 40,2    | 17,5    | 0,0                     | 0,0     | 142,7   |
| MIMAT0000073                  | 0,0              | 12,5    | 4,6     | 38,0              | 62,2    | 9,8     | 160,6                   | 0,0     | 154,6   |
| MIMAT0000074                  | 0,0              | 0,0     | 0,0     | 28,5              | 12,0    | 3,6     | 0,0                     | 0,0     | 0,0     |
| MIMAT0000074_1                | 0,0              | 0,0     | 4,6     | 23,8              | 10,0    | 6,7     | 0,0                     | 0,0     | 0,0     |
| MIMAT0000075                  | 622,2            | 0,0     | 388,4   | 262,4             | 572,9   | 407,0   | 998,5                   | 204,3   | 662,2   |
| MIMAT0000076                  | 12204,3          | 13598,1 | 26783,7 | 12613,3           | 12238,5 | 11736,6 | 12871,9                 | 10500,2 | 11693,2 |
| MIMAT0000077                  | 6402,8           | 162,5   | 383,7   | 710,1             | 744,6   | 800,0   | 659,9                   | 171,6   | 951,6   |
| MIMAT0000078                  | 619,2            | 0,0     | 0,0     | 0,0               | 66,4    | 1,0     | 0,0                     | 179,8   | 0,0     |
| MIMAT0000080                  | 532,1            | 949,9   | 453,1   | 958,9             | 879,0   | 915,6   | 269,2                   | 719,1   | 741,5   |
| MIMAT0000080_1                | 562,1            | 1212,3  | 517,8   | 983,3             | 937,3   | 921,7   | 334,3                   | 408,6   | 769,2   |
| MIMAT0000081                  | 5347,7           | 3037,1  | 2991,4  | 7081,2            | 8961,0  | 8260,1  | 10484,2                 | 7403,2  | 8441,8  |
| MIMAT0000082                  | 10668,3          | 10985,9 | 13542,1 | 11663,3           | 10360,7 | 10873,6 | 8947,4                  | 10737,1 | 12303,9 |
| MIMAT0000082_1                | 10388,7          | 11010,9 | 13093,6 | 11885,3           | 10520,4 | 11136,7 | 8778,1                  | 11170,2 | 12684,5 |
| MIMAT0000083                  | 1136,3           | 2149,7  | 901,6   | 1188,7            | 1325,3  | 1369,5  | 1697,4                  | 1846,7  | 2093,6  |
| MIMAT0000084                  | 958,9            | 4699,3  | 2376,5  | 1956,4            | 1907,9  | 1604,1  | 1888,5                  | 2304,3  | 3136,4  |
| MIMAT0000085                  | 3,0              | 12,5    | 499,3   | 3,0               | 41,5    | 59,8    | 73,8                    | 8,2     | 0,0     |
| MIMAT0000086                  | 1497,0           | 1224,8  | 1021,8  | 166,8             | 422,6   | 305,9   | 0,0                     | 8,2     | 460,0   |
| MIMAT0000087                  | 766,5            | 1562,3  | 3070,0  | 324,8             | 382,8   | 309,5   | 1224,2                  | 1307,4  | 154,6   |
| MIMAT0000088                  | 171,3            | 25,0    | 462,3   | 54,0              | 109,8   | 121,2   | 112,9                   | 237,0   | 210,2   |
| MIMAT0000090                  | 3,0              | 0,0     | 9,2     | 106,9             | 91,7    | 125,9   | 173,7                   | 326,9   | 0,0     |
| MIMAT0000092                  | 3483,9           | 3849,5  | 2774,1  | 11250,0           | 9875,9  | 11006,2 | 9511,8                  | 8539,0  | 8628,2  |
| MIMAT0000092_1                | 3387,8           | 3637,0  | 2533,7  | 11067,1           | 9373,3  | 10005,5 | 8860,6                  | 9160,1  | 8378,4  |
| MIMAT0000093                  | 0,0              | 0,0     | 0,0     | 174,6             | 218,3   | 314,1   | 195,4                   | 187,9   | 230,0   |
| MIMAT0000094                  | 0,0              | 0,0     | 263,5   | 44,5              | 12,0    | 0,0     | 0,0                     | 138,9   | 0,0     |
| MIMAT0000095                  | 0,0              | 0,0     | 0,0     | 110,4             | 91,0    | 81,0    | 117,2                   | 106,2   | 198,3   |
| MIMAT0000096                  | 270,5            | 262,5   | 18,5    | 463,1             | 284,0   | 430,7   | 17,4                    | 0,0     | 170,5   |
| MIMAT0000097                  | 5122,2           | 4311,9  | 4383,0  | 3126,2            | 4063,8  | 3603,4  | 2522,3                  | 2672,0  | 2930,3  |
| MIMAT0000098                  | 5876,7           | 699,9   | 2353,3  | 374,7             | 754,0   | 743,8   | 1033,2                  | 359,5   | 218,1   |
| MIMAT0000099                  | 2573,1           | 674,9   | 2926,6  | 2231,4            | 2840,6  | 2715,2  | 2800,1                  | 2598,5  | 1954,8  |
| MIMAT0000099_1                | 2558,1           | 787,4   | 3033,0  | 2411,9            | 2949,8  | 2890,6  | 3295,0                  | 2672,0  | 1958,8  |
| MIMAT0000100                  | 0,0              | 0,0     | 0,0     | 31,5              | 5,5     | 21,1    | 47,8                    | 0,0     | 0,0     |
| MIMAT0000100_1                | 0,0              | 0,0     | 0,0     | 26,7              | 3,9     | 20,6    | 78,1                    | 0,0     | 0,0     |

|                |         |         |         |         |         |         |         |         |         |
|----------------|---------|---------|---------|---------|---------|---------|---------|---------|---------|
| MIMAT0000101   | 0,0     | 412,4   | 203,4   | 158,5   | 130,8   | 147,5   | 338,6   | 163,4   | 281,5   |
| MIMAT0000101_1 | 3,0     | 412,4   | 272,8   | 155,6   | 146,7   | 165,1   | 343,0   | 163,4   | 253,8   |
| MIMAT0000104   | 0,0     | 12,5    | 268,2   | 33,3    | 37,6    | 23,7    | 4,3     | 8,2     | 142,7   |
| MIMAT0000222   | 324,6   | 487,4   | 425,4   | 1325,3  | 1868,0  | 1844,5  | 1905,8  | 2851,8  | 2589,2  |
| MIMAT0000227   | 0,0     | 0,0     | 0,0     | 0,0     | 18,1    | 15,0    | 0,0     | 0,0     | 202,2   |
| MIMAT0000231   | 120,2   | 12,5    | 217,3   | 47,5    | 54,7    | 61,4    | 0,0     | 0,0     | 4,0     |
| MIMAT0000231_1 | 135,3   | 0,0     | 263,5   | 51,1    | 47,6    | 54,7    | 4,3     | 0,0     | 0,0     |
| MIMAT0000232   | 3,0     | 287,5   | 1243,7  | 37,4    | 70,3    | 36,1    | 104,2   | 0,0     | 206,2   |
| MIMAT0000232_1 | 0,0     | 350,0   | 1003,3  | 44,5    | 71,6    | 38,7    | 95,5    | 16,3    | 222,0   |
| MIMAT0000243   | 16085,1 | 25083,9 | 18124,0 | 32092,3 | 47595,1 | 46380,5 | 24328,6 | 27169,7 | 20908,3 |
| MIMAT0000244   | 201,4   | 12,5    | 730,5   | 239,9   | 181,4   | 340,4   | 191,0   | 89,9    | 305,3   |
| MIMAT0000244_1 | 156,3   | 12,5    | 776,7   | 220,3   | 182,3   | 346,1   | 147,6   | 171,6   | 230,0   |
| MIMAT0000245   | 6483,9  | 11348,4 | 8220,5  | 10520,9 | 10798,6 | 10791,6 | 6021,4  | 7632,0  | 7018,3  |
| MIMAT0000250   | 580,2   | 774,9   | 1498,0  | 216,7   | 428,5   | 261,0   | 790,1   | 416,7   | 0,0     |
| MIMAT0000252   | 141,3   | 562,4   | 4,6     | 571,2   | 518,2   | 578,7   | 455,8   | 433,1   | 519,4   |
| MIMAT0000252_1 | 177,4   | 437,4   | 0,0     | 554,0   | 482,6   | 555,5   | 421,1   | 514,8   | 574,9   |
| MIMAT0000252_2 | 156,3   | 374,9   | 4,6     | 549,2   | 484,2   | 551,9   | 468,9   | 424,9   | 491,7   |
| MIMAT0000253   | 6565,1  | 8348,8  | 9658,4  | 4589,2  | 6370,7  | 4840,8  | 6338,3  | 6929,3  | 6106,3  |
| MIMAT0000254   | 17732,3 | 22796,8 | 20005,7 | 7267,7  | 9140,7  | 8861,0  | 15099,0 | 13123,2 | 15920,1 |
| MIMAT0000256   | 745,5   | 175,0   | 850,7   | 237,5   | 336,5   | 292,5   | 677,2   | 441,3   | 559,1   |
| MIMAT0000256_1 | 775,5   | 275,0   | 721,3   | 219,7   | 326,8   | 323,9   | 685,9   | 441,3   | 571,0   |
| MIMAT0000257   | 0,0     | 212,5   | 0,0     | 45,7    | 38,5    | 81,5    | 69,5    | 16,3    | 4,0     |
| MIMAT0000257_1 | 0,0     | 200,0   | 4,6     | 49,9    | 39,8    | 81,0    | 43,4    | 89,9    | 0,0     |
| MIMAT0000259   | 2876,7  | 474,9   | 443,9   | 1875,7  | 2272,9  | 1914,1  | 2926,0  | 947,9   | 1526,6  |
| MIMAT0000261   | 2197,4  | 325,0   | 1382,4  | 3275,8  | 3904,2  | 3911,8  | 3898,5  | 2680,2  | 2712,2  |
| MIMAT0000263   | 0,0     | 0,0     | 0,0     | 0,0     | 25,6    | 0,0     | 325,6   | 0,0     | 0,0     |
| MIMAT0000264   | 523,0   | 112,5   | 4,6     | 15,4    | 16,5    | 8,3     | 0,0     | 0,0     | 35,7    |
| MIMAT0000267   | 138,3   | 0,0     | 0,0     | 0,6     | 5,8     | 0,0     | 0,0     | 8,2     | 0,0     |
| MIMAT0000272   | 12,0    | 0,0     | 9,2     | 141,3   | 209,2   | 145,5   | 4,3     | 0,0     | 7,9     |
| MIMAT0000275   | 3,0     | 0,0     | 0,0     | 42,2    | 30,1    | 67,6    | 0,0     | 0,0     | 0,0     |
| MIMAT0000275_1 | 3,0     | 0,0     | 0,0     | 33,8    | 30,8    | 62,9    | 4,3     | 0,0     | 0,0     |
| MIMAT0000278   | 3,0     | 1024,9  | 4,6     | 213,8   | 145,7   | 107,8   | 751,0   | 16,3    | 0,0     |
| MIMAT0000279   | 643,3   | 100,0   | 957,1   | 1309,8  | 717,7   | 984,7   | 751,0   | 792,6   | 571,0   |
| MIMAT0000280   | 0,0     | 25,0    | 0,0     | 35,6    | 48,6    | 32,0    | 0,0     | 0,0     | 0,0     |
| MIMAT0000281   | 6,0     | 0,0     | 531,7   | 422,8   | 454,1   | 385,8   | 86,8    | 0,0     | 574,9   |
| MIMAT0000318   | 3,0     | 0,0     | 0,0     | 41,6    | 0,6     | 0,5     | 73,8    | 8,2     | 0,0     |
| MIMAT0000414   | 7220,4  | 4224,4  | 1484,1  | 6413,2  | 6583,2  | 6249,0  | 7801,3  | 7893,5  | 8564,7  |
| MIMAT0000415   | 16947,8 | 15422,8 | 17587,6 | 36271,8 | 33614,2 | 34463,4 | 32624,8 | 34997,8 | 38291,5 |
| MIMAT0000416   | 186,4   | 0,0     | 4,6     | 5,9     | 74,2    | 16,5    | 191,0   | 8,2     | 0,0     |
| MIMAT0000416_1 | 162,3   | 0,0     | 0,0     | 3,0     | 79,7    | 15,5    | 178,0   | 8,2     | 0,0     |
| MIMAT0000417   | 0,0     | 0,0     | 0,0     | 0,0     | 82,9    | 6,7     | 4,3     | 187,9   | 0,0     |
| MIMAT0000418   | 0,0     | 687,4   | 4,6     | 28,5    | 37,6    | 0,5     | 4,3     | 89,9    | 0,0     |
| MIMAT0000419   | 3315,6  | 2462,1  | 1830,9  | 1830,0  | 2016,4  | 1862,0  | 1888,5  | 1740,5  | 2395,0  |
| MIMAT0000420   | 6,0     | 0,0     | 0,0     | 20,8    | 11,3    | 0,0     | 0,0     | 0,0     | 0,0     |
| MIMAT0000421   | 96600,6 | 41831,5 | 61062,0 | 82821,0 | 95959,7 | 96922,0 | 15815,3 | 14945,4 | 10816,9 |
| MIMAT0000423   | 405,8   | 0,0     | 4,6     | 21,4    | 79,0    | 62,9    | 0,0     | 0,0     | 4,0     |
| MIMAT0000423_1 | 375,7   | 0,0     | 0,0     | 19,0    | 68,0    | 77,9    | 0,0     | 0,0     | 0,0     |
| MIMAT0000424   | 3655,3  | 2812,1  | 1673,7  | 3534,7  | 3868,6  | 3684,4  | 1654,0  | 1250,2  | 2006,4  |

|                |         |         |         |         |         |         |         |         |         |
|----------------|---------|---------|---------|---------|---------|---------|---------|---------|---------|
| MIMAT0000424_1 | 2543,1  | 1074,8  | 841,5   | 2156,0  | 2538,8  | 2061,7  | 646,9   | 735,4   | 1296,6  |
| MIMAT0000425   | 0,0     | 0,0     | 0,0     | 6,5     | 26,9    | 0,0     | 0,0     | 0,0     | 0,0     |
| MIMAT0000431   | 0,0     | 0,0     | 0,0     | 81,3    | 20,7    | 58,8    | 147,6   | 0,0     | 333,1   |
| MIMAT0000433   | 42,1    | 2274,7  | 2297,9  | 2323,4  | 3048,5  | 2677,0  | 4063,4  | 4265,4  | 4908,9  |
| MIMAT0000434   | 0,0     | 12,5    | 0,0     | 454,8   | 410,7   | 426,1   | 91,2    | 866,2   | 456,0   |
| MIMAT0000435   | 6474,9  | 7948,9  | 9399,5  | 1638,2  | 1791,9  | 1755,3  | 6481,5  | 4298,1  | 1268,9  |
| MIMAT0000436   | 0,0     | 399,9   | 4,6     | 1490,3  | 1183,4  | 1310,7  | 1115,7  | 1266,6  | 1316,4  |
| MIMAT0000437   | 0,0     | 0,0     | 402,2   | 0,0     | 0,3     | 0,0     | 438,5   | 8,2     | 321,2   |
| MIMAT0000438   | 0,0     | 212,5   | 9,2     | 50,5    | 24,6    | 73,8    | 0,0     | 16,3    | 0,0     |
| MIMAT0000440   | 1536,1  | 1687,3  | 887,7   | 730,3   | 1088,5  | 1470,6  | 1532,5  | 2353,3  | 182,4   |
| MIMAT0000443   | 1325,6  | 3712,0  | 5071,9  | 982,1   | 978,4   | 728,3   | 1832,0  | 1291,1  | 824,8   |
| MIMAT0000444   | 3,0     | 674,9   | 4,6     | 24,9    | 186,9   | 81,0    | 65,1    | 8,2     | 194,3   |
| MIMAT0000445   | 9973,9  | 31658,0 | 26349,1 | 11507,1 | 13744,5 | 14782,9 | 19939,5 | 25306,6 | 21059,0 |
| MIMAT0000446   | 24,0    | 50,0    | 9,2     | 55,8    | 58,9    | 36,1    | 138,9   | 16,3    | 4,0     |
| MIMAT0000447   | 0,0     | 12,5    | 184,9   | 394,9   | 276,3   | 105,2   | 169,3   | 0,0     | 4,0     |
| MIMAT0000449   | 411,8   | 1312,3  | 2265,5  | 1005,8  | 858,9   | 1740,8  | 811,8   | 1233,9  | 559,1   |
| MIMAT0000451   | 3,0     | 387,4   | 4,6     | 323,0   | 519,8   | 192,9   | 1002,8  | 1103,1  | 1605,9  |
| MIMAT0000454   | 28208,2 | 25,0    | 0,0     | 136,0   | 20,4    | 5,2     | 230,1   | 490,3   | 0,0     |
| MIMAT0000455   | 487,0   | 187,5   | 23,1    | 545,7   | 600,1   | 501,9   | 277,8   | 441,3   | 812,9   |
| MIMAT0000456   | 682,4   | 599,9   | 610,3   | 1034,9  | 1139,7  | 1023,9  | 555,7   | 1707,8  | 1697,1  |
| MIMAT0000458   | 0,0     | 0,0     | 0,0     | 28,5    | 0,0     | 19,6    | 0,0     | 0,0     | 0,0     |
| MIMAT0000460   | 0,0     | 150,0   | 0,0     | 89,1    | 64,1    | 89,2    | 160,6   | 122,6   | 0,0     |
| MIMAT0000460_1 | 0,0     | 150,0   | 9,2     | 92,0    | 72,2    | 86,7    | 186,7   | 65,4    | 0,0     |
| MIMAT0000461   | 0,0     | 0,0     | 0,0     | 0,0     | 16,8    | 0,5     | 0,0     | 0,0     | 0,0     |
| MIMAT0000462   | 2278,5  | 287,5   | 0,0     | 0,0     | 45,0    | 34,6    | 0,0     | 0,0     | 0,0     |
| MIMAT0000510   | 1196,4  | 1787,2  | 1770,8  | 1732,6  | 1933,8  | 2032,3  | 1059,3  | 1225,7  | 1126,1  |
| MIMAT0000617   | 0,0     | 0,0     | 0,0     | 26,1    | 47,6    | 28,4    | 0,0     | 269,7   | 0,0     |
| MIMAT0000646   | 348,7   | 1687,3  | 1479,5  | 118,2   | 88,4    | 148,6   | 738,0   | 0,0     | 705,8   |
| MIMAT0000680   | 0,0     | 187,5   | 0,0     | 137,8   | 79,3    | 66,0    | 0,0     | 498,5   | 0,0     |
| MIMAT0000681   | 3,0     | 374,9   | 0,0     | 42,2    | 6,8     | 29,4    | 0,0     | 0,0     | 0,0     |
| MIMAT0000682   | 1424,8  | 0,0     | 4,6     | 17,8    | 40,8    | 59,8    | 4,3     | 0,0     | 0,0     |
| MIMAT0000688   | 0,0     | 0,0     | 0,0     | 0,0     | 17,2    | 0,0     | 0,0     | 0,0     | 0,0     |
| MIMAT0000689   | 1163,3  | 1487,3  | 938,6   | 425,7   | 636,1   | 625,2   | 616,5   | 482,1   | 749,4   |
| MIMAT0000692   | 435,9   | 512,4   | 420,7   | 978,5   | 759,5   | 855,2   | 586,1   | 604,7   | 1447,3  |
| MIMAT0000693   | 219,4   | 512,4   | 13,9    | 442,4   | 486,4   | 680,9   | 325,6   | 106,2   | 1030,9  |
| MIMAT0000703   | 0,0     | 0,0     | 4,6     | 38,6    | 18,8    | 55,2    | 0,0     | 0,0     | 0,0     |
| MIMAT0000705   | 0,0     | 0,0     | 0,0     | 42,8    | 0,0     | 28,4    | 4,3     | 8,2     | 0,0     |
| MIMAT0000707   | 276,6   | 424,9   | 494,7   | 1936,3  | 1935,1  | 2176,2  | 1332,8  | 2410,5  | 2617,0  |
| MIMAT0000722   | 6,0     | 25,0    | 18,5    | 18,4    | 20,1    | 14,4    | 13,0    | 16,3    | 0,0     |
| MIMAT0000727   | 0,0     | 0,0     | 0,0     | 62,3    | 76,1    | 105,7   | 130,2   | 0,0     | 222,0   |
| MIMAT0000728   | 279,6   | 162,5   | 420,7   | 188,8   | 377,3   | 278,5   | 4,3     | 8,2     | 7,9     |
| MIMAT0000732   | 225,4   | 62,5    | 161,8   | 299,9   | 287,3   | 352,3   | 60,8    | 187,9   | 388,6   |
| MIMAT0000733   | 3,0     | 12,5    | 4,6     | 52,3    | 24,6    | 24,8    | 0,0     | 8,2     | 4,0     |
| MIMAT0000736   | 0,0     | 12,5    | 0,0     | 43,9    | 29,5    | 146,0   | 8,7     | 16,3    | 0,0     |
| MIMAT0000737   | 0,0     | 0,0     | 0,0     | 209,6   | 236,1   | 168,2   | 147,6   | 0,0     | 0,0     |
| MIMAT0000750   | 3,0     | 12,5    | 0,0     | 221,5   | 134,7   | 160,9   | 4,3     | 40,9    | 0,0     |
| MIMAT0000751   | 0,0     | 0,0     | 9,2     | 96,2    | 23,6    | 30,9    | 0,0     | 122,6   | 0,0     |
| MIMAT0000752   | 9,0     | 0,0     | 13,9    | 226,8   | 184,3   | 150,1   | 247,5   | 8,2     | 35,7    |

|                |         |         |         |         |         |         |         |         |         |
|----------------|---------|---------|---------|---------|---------|---------|---------|---------|---------|
| MIMAT0000753   | 0,0     | 0,0     | 1063,4  | 0,0     | 0,0     | 16,0    | 0,0     | 849,8   | 233,9   |
| MIMAT0000754   | 0,0     | 0,0     | 0,0     | 0,0     | 23,6    | 0,5     | 0,0     | 0,0     | 0,0     |
| MIMAT0000755   | 0,0     | 0,0     | 0,0     | 0,0     | 22,0    | 20,6    | 0,0     | 0,0     | 0,0     |
| MIMAT0000756   | 0,0     | 0,0     | 0,0     | 4,2     | 32,1    | 0,0     | 0,0     | 0,0     | 0,0     |
| MIMAT0000757   | 10857,6 | 8611,3  | 10726,4 | 7843,6  | 9608,1  | 10209,8 | 5287,7  | 4584,1  | 4361,7  |
| MIMAT0000759   | 745,5   | 399,9   | 83,2    | 399,0   | 610,8   | 421,9   | 17,4    | 286,0   | 285,5   |
| MIMAT0000763   | 0,0     | 0,0     | 0,0     | 0,0     | 0,0     | 0,0     | 0,0     | 0,0     | 257,7   |
| MIMAT0000764   | 0,0     | 0,0     | 0,0     | 7,7     | 9,4     | 36,6    | 0,0     | 0,0     | 0,0     |
| MIMAT0000772   | 0,0     | 25,0    | 0,0     | 11,9    | 0,6     | 42,3    | 0,0     | 0,0     | 0,0     |
| MIMAT0001080   | 0,0     | 0,0     | 0,0     | 36,2    | 0,0     | 26,8    | 212,7   | 179,8   | 0,0     |
| MIMAT0001340   | 414,8   | 2337,2  | 596,4   | 3095,3  | 2622,0  | 2520,2  | 1775,6  | 1029,6  | 1827,9  |
| MIMAT0001343   | 0,0     | 0,0     | 0,0     | 7,7     | 30,1    | 0,5     | 0,0     | 0,0     | 222,0   |
| MIMAT0001413   | 0,0     | 0,0     | 0,0     | 7,7     | 100,7   | 28,4    | 0,0     | 0,0     | 0,0     |
| MIMAT0001545   | 0,0     | 0,0     | 0,0     | 11,3    | 12,0    | 0,0     | 4,3     | 0,0     | 0,0     |
| MIMAT0001545_1 | 0,0     | 0,0     | 0,0     | 8,3     | 12,0    | 0,0     | 0,0     | 0,0     | 0,0     |
| MIMAT0001618   | 0,0     | 0,0     | 0,0     | 17,8    | 0,3     | 18,1    | 0,0     | 0,0     | 0,0     |
| MIMAT0001620   | 0,0     | 0,0     | 13,9    | 0,0     | 21,7    | 0,0     | 0,0     | 0,0     | 0,0     |
| MIMAT0001621   | 0,0     | 0,0     | 0,0     | 7,7     | 21,4    | 42,3    | 0,0     | 0,0     | 0,0     |
| MIMAT0001631   | 7436,8  | 14098,0 | 6250,9  | 26772,8 | 34652,5 | 35062,7 | 33809,9 | 47704,3 | 38699,9 |
| MIMAT0001639   | 610,2   | 1287,3  | 929,3   | 2115,6  | 2081,2  | 1905,9  | 625,1   | 514,8   | 158,6   |
| MIMAT0002174   | 3,0     | 225,0   | 13,9    | 206,0   | 123,7   | 174,9   | 178,0   | 89,9    | 4,0     |
| MIMAT0002175   | 3,0     | 275,0   | 416,1   | 163,3   | 129,5   | 179,0   | 0,0     | 81,7    | 186,4   |
| MIMAT0002176   | 0,0     | 362,4   | 0,0     | 133,6   | 114,0   | 130,5   | 269,2   | 0,0     | 0,0     |
| MIMAT0002177   | 19653,2 | 9748,6  | 8151,2  | 32782,8 | 34142,1 | 28120,5 | 27593,2 | 23051,3 | 23743,4 |
| MIMAT0002177_1 | 20134,1 | 10111,1 | 8706,0  | 34112,3 | 35436,9 | 29662,8 | 28570,0 | 20624,5 | 24504,7 |
| MIMAT0002808   | 264,5   | 0,0     | 0,0     | 42,8    | 39,8    | 25,3    | 0,0     | 8,2     | 0,0     |
| MIMAT0002809   | 2170,3  | 2249,7  | 3754,2  | 2153,0  | 2227,5  | 2659,0  | 6225,4  | 7713,7  | 8981,1  |
| MIMAT0002814   | 0,0     | 0,0     | 9,2     | 36,8    | 0,3     | 0,5     | 69,5    | 0,0     | 0,0     |
| MIMAT0002817   | 0,0     | 624,9   | 0,0     | 17,2    | 72,5    | 71,7    | 0,0     | 0,0     | 0,0     |
| MIMAT0002821   | 0,0     | 12,5    | 4,6     | 0,0     | 0,3     | 1,5     | 0,0     | 8,2     | 210,2   |
| MIMAT0002870   | 0,0     | 0,0     | 0,0     | 0,0     | 27,2    | 48,0    | 0,0     | 0,0     | 0,0     |
| MIMAT0002874   | 0,0     | 0,0     | 0,0     | 15,4    | 23,3    | 35,6    | 0,0     | 0,0     | 4,0     |
| MIMAT0002875   | 0,0     | 0,0     | 0,0     | 16,0    | 0,0     | 0,0     | 208,4   | 0,0     | 0,0     |
| MIMAT0002888   | 814,6   | 1249,8  | 4,6     | 899,6   | 780,8   | 873,3   | 898,6   | 572,0   | 1225,2  |
| MIMAT0002891   | 0,0     | 0,0     | 0,0     | 35,0    | 40,2    | 23,7    | 0,0     | 8,2     | 0,0     |
| MIMAT0003218   | 213,4   | 25,0    | 4,6     | 86,1    | 103,0   | 57,3    | 0,0     | 179,8   | 4,0     |
| MIMAT0003239   | 0,0     | 0,0     | 0,0     | 0,0     | 19,4    | 0,0     | 0,0     | 0,0     | 0,0     |
| MIMAT0003241   | 0,0     | 0,0     | 0,0     | 0,0     | 39,2    | 0,0     | 0,0     | 0,0     | 4,0     |
| MIMAT0003249   | 279,6   | 62,5    | 878,5   | 408,5   | 392,5   | 435,9   | 134,6   | 40,9    | 4,0     |
| MIMAT0003266   | 360,7   | 50,0    | 0,0     | 0,0     | 0,0     | 18,1    | 0,0     | 0,0     | 0,0     |
| MIMAT0003297   | 0,0     | 0,0     | 0,0     | 71,8    | 24,6    | 18,1    | 0,0     | 0,0     | 0,0     |
| MIMAT0003321   | 60,1    | 0,0     | 0,0     | 0,0     | 24,6    | 0,0     | 0,0     | 0,0     | 0,0     |
| MIMAT0003322   | 0,0     | 0,0     | 0,0     | 7,7     | 0,3     | 0,0     | 334,3   | 318,7   | 0,0     |
| MIMAT0003329   | 0,0     | 0,0     | 0,0     | 21,4    | 20,7    | 1,0     | 0,0     | 424,9   | 0,0     |
| MIMAT0003330   | 3,0     | 212,5   | 0,0     | 0,0     | 9,4     | 1,5     | 0,0     | 0,0     | 0,0     |
| MIMAT0003338   | 0,0     | 0,0     | 0,0     | 4,8     | 25,3    | 25,8    | 0,0     | 0,0     | 0,0     |
| MIMAT0003339   | 3,0     | 0,0     | 0,0     | 14,3    | 0,3     | 29,9    | 0,0     | 0,0     | 0,0     |
| MIMAT0003385   | 0,0     | 0,0     | 0,0     | 13,7    | 0,3     | 0,0     | 165,0   | 0,0     | 0,0     |

|                |         |        |        |         |         |         |         |        |         |
|----------------|---------|--------|--------|---------|---------|---------|---------|--------|---------|
| MIMAT0003389   | 0,0     | 0,0    | 0,0    | 0,0     | 22,7    | 0,0     | 0,0     | 0,0    | 0,0     |
| MIMAT0003393   | 6,0     | 37,5   | 9,2    | 238,1   | 196,3   | 185,7   | 182,3   | 16,3   | 134,8   |
| MIMAT0003884   | 0,0     | 0,0    | 0,0    | 19,0    | 0,0     | 15,0    | 0,0     | 0,0    | 0,0     |
| MIMAT0003886   | 3,0     | 12,5   | 0,0    | 41,6    | 23,6    | 1,5     | 0,0     | 0,0    | 0,0     |
| MIMAT0004481   | 0,0     | 0,0    | 46,2   | 32,1    | 103,6   | 83,6    | 65,1    | 0,0    | 4,0     |
| MIMAT0004481_1 | 0,0     | 0,0    | 64,7   | 40,4    | 104,3   | 53,1    | 91,2    | 0,0    | 4,0     |
| MIMAT0004482   | 0,0     | 0,0    | 0,0    | 36,2    | 48,3    | 29,9    | 91,2    | 0,0    | 0,0     |
| MIMAT0004484   | 3649,3  | 1287,3 | 980,2  | 2600,7  | 3405,1  | 2048,8  | 1319,8  | 1062,3 | 1859,7  |
| MIMAT0004495   | 72,1    | 0,0    | 0,0    | 32,7    | 10,4    | 23,7    | 0,0     | 0,0    | 0,0     |
| MIMAT0004497   | 0,0     | 0,0    | 0,0    | 39,2    | 52,5    | 22,2    | 0,0     | 8,2    | 182,4   |
| MIMAT0004498   | 3,0     | 0,0    | 0,0    | 0,0     | 0,0     | 9,8     | 0,0     | 8,2    | 130,9   |
| MIMAT0004500   | 0,0     | 0,0    | 0,0    | 15,4    | 0,3     | 0,0     | 134,6   | 0,0    | 0,0     |
| MIMAT0004501   | 0,0     | 0,0    | 0,0    | 22,0    | 0,0     | 13,9    | 0,0     | 114,4  | 122,9   |
| MIMAT0004502   | 3,0     | 0,0    | 9,2    | 48,7    | 212,1   | 252,2   | 460,2   | 482,1  | 289,5   |
| MIMAT0004505   | 0,0     | 0,0    | 0,0    | 0,0     | 24,6    | 0,0     | 0,0     | 0,0    | 0,0     |
| MIMAT0004518   | 2991,0  | 1137,3 | 1655,2 | 2582,9  | 2438,0  | 2423,8  | 2470,2  | 2255,3 | 2843,0  |
| MIMAT0004549   | 0,0     | 0,0    | 0,0    | 0,0     | 17,5    | 0,0     | 0,0     | 0,0    | 0,0     |
| MIMAT0004552   | 330,7   | 0,0    | 0,0    | 113,4   | 64,8    | 99,5    | 4,3     | 147,1  | 0,0     |
| MIMAT0004558   | 0,0     | 12,5   | 0,0    | 33,8    | 47,0    | 78,9    | 0,0     | 0,0    | 0,0     |
| MIMAT0004563   | 3,0     | 399,9  | 1188,2 | 35,0    | 68,7    | 34,0    | 104,2   | 8,2    | 206,2   |
| MIMAT0004568   | 0,0     | 0,0    | 0,0    | 0,0     | 8,7     | 51,1    | 0,0     | 0,0    | 0,0     |
| MIMAT0004570   | 327,7   | 537,4  | 887,7  | 368,1   | 694,7   | 537,5   | 507,9   | 57,2   | 384,6   |
| MIMAT0004571   | 0,0     | 0,0    | 0,0    | 0,0     | 17,8    | 0,0     | 0,0     | 0,0    | 0,0     |
| MIMAT0004586   | 0,0     | 0,0    | 0,0    | 22,6    | 0,3     | 76,9    | 0,0     | 0,0    | 0,0     |
| MIMAT0004594   | 0,0     | 0,0    | 4,6    | 0,0     | 26,6    | 21,7    | 0,0     | 0,0    | 0,0     |
| MIMAT0004597   | 1611,2  | 899,9  | 1160,5 | 548,6   | 987,1   | 778,9   | 764,1   | 1470,8 | 900,1   |
| MIMAT0004600   | 838,7   | 637,4  | 0,0    | 364,0   | 837,2   | 624,6   | 4,3     | 433,1  | 400,5   |
| MIMAT0004601   | 0,0     | 0,0    | 0,0    | 64,7    | 50,2    | 30,4    | 0,0     | 237,0  | 0,0     |
| MIMAT0004608   | 0,0     | 0,0    | 0,0    | 0,0     | 23,6    | 0,0     | 0,0     | 0,0    | 0,0     |
| MIMAT0004610   | 3,0     | 150,0  | 0,0    | 144,9   | 83,9    | 115,0   | 112,9   | 196,1  | 499,6   |
| MIMAT0004614   | 0,0     | 0,0    | 4,6    | 83,7    | 79,0    | 62,4    | 4,3     | 0,0    | 0,0     |
| MIMAT0004615   | 769,5   | 0,0    | 0,0    | 20,2    | 0,0     | 21,1    | 0,0     | 0,0    | 23,8    |
| MIMAT0004672   | 378,8   | 12,5   | 13,9   | 315,9   | 242,3   | 336,3   | 308,2   | 196,1  | 7,9     |
| MIMAT0004678   | 0,0     | 0,0    | 4,6    | 23,2    | 8,1     | 24,8    | 0,0     | 0,0    | 0,0     |
| MIMAT0004680   | 261,5   | 0,0    | 198,8  | 171,0   | 227,0   | 172,3   | 0,0     | 73,5   | 0,0     |
| MIMAT0004682   | 3,0     | 25,0   | 13,9   | 18,4    | 102,3   | 213,5   | 494,9   | 171,6  | 0,0     |
| MIMAT0004688   | 0,0     | 0,0    | 0,0    | 57,0    | 76,1    | 101,6   | 0,0     | 237,0  | 0,0     |
| MIMAT0004692   | 9,0     | 300,0  | 148,0  | 552,2   | 336,5   | 408,0   | 377,7   | 24,5   | 709,8   |
| MIMAT0004693   | 0,0     | 0,0    | 0,0    | 35,6    | 31,1    | 15,0    | 0,0     | 0,0    | 0,0     |
| MIMAT0004694   | 1355,7  | 12,5   | 1308,4 | 403,2   | 381,5   | 330,6   | 885,6   | 1307,4 | 678,0   |
| MIMAT0004699   | 0,0     | 0,0    | 0,0    | 10,1    | 58,6    | 57,8    | 0,0     | 0,0    | 0,0     |
| MIMAT0004700   | 0,0     | 0,0    | 0,0    | 0,0     | 19,4    | 13,9    | 0,0     | 0,0    | 0,0     |
| MIMAT0004701   | 0,0     | 0,0    | 0,0    | 0,0     | 57,6    | 0,0     | 0,0     | 0,0    | 0,0     |
| MIMAT0004702   | 0,0     | 0,0    | 0,0    | 30,9    | 22,0    | 80,5    | 0,0     | 73,5   | 0,0     |
| MIMAT0004703   | 6,0     | 0,0    | 13,9   | 136,0   | 73,2    | 48,5    | 8,7     | 0,0    | 0,0     |
| MIMAT0004748   | 11302,5 | 6111,6 | 4498,6 | 15829,1 | 16968,2 | 17199,5 | 10527,6 | 9797,4 | 11340,3 |
| MIMAT0004749   | 3,0     | 125,0  | 4,6    | 65,3    | 88,1    | 69,1    | 321,3   | 0,0    | 206,2   |
| MIMAT0004761   | 0,0     | 12,5   | 0,0    | 306,4   | 456,0   | 339,9   | 0,0     | 0,0    | 218,1   |

|                |       |       |       |       |       |       |       |       |       |
|----------------|-------|-------|-------|-------|-------|-------|-------|-------|-------|
| MIMAT0004762   | 0,0   | 12,5  | 0,0   | 126,5 | 226,7 | 117,6 | 178,0 | 114,4 | 71,4  |
| MIMAT0004762_1 | 3,0   | 0,0   | 4,6   | 101,5 | 93,9  | 61,4  | 117,2 | 171,6 | 63,4  |
| MIMAT0004767   | 117,2 | 0,0   | 0,0   | 42,8  | 63,2  | 44,9  | 0,0   | 0,0   | 0,0   |
| MIMAT0004774   | 3,0   | 12,5  | 4,6   | 57,6  | 105,6 | 164,5 | 0,0   | 171,6 | 0,0   |
| MIMAT0004775   | 0,0   | 0,0   | 0,0   | 0,0   | 0,0   | 30,4  | 21,7  | 0,0   | 0,0   |
| MIMAT0004776   | 0,0   | 0,0   | 0,0   | 11,9  | 40,5  | 16,5  | 0,0   | 0,0   | 0,0   |
| MIMAT0004792   | 0,0   | 0,0   | 0,0   | 86,1  | 24,6  | 51,6  | 0,0   | 130,7 | 0,0   |
| MIMAT0004796   | 0,0   | 0,0   | 0,0   | 4,8   | 8,4   | 8,8   | 0,0   | 8,2   | 0,0   |
| MIMAT0004797   | 0,0   | 0,0   | 0,0   | 0,0   | 22,3  | 0,0   | 0,0   | 155,3 | 0,0   |
| MIMAT0004799   | 0,0   | 0,0   | 0,0   | 19,0  | 0,3   | 25,8  | 4,3   | 0,0   | 4,0   |
| MIMAT0004808   | 3,0   | 0,0   | 235,8 | 216,7 | 197,6 | 184,7 | 8,7   | 0,0   | 170,5 |
| MIMAT0004810   | 3,0   | 0,0   | 4,6   | 105,7 | 211,2 | 69,6  | 151,9 | 8,2   | 0,0   |
| MIMAT0004813   | 0,0   | 0,0   | 0,0   | 0,0   | 17,8  | 21,7  | 0,0   | 0,0   | 0,0   |
| MIMAT0004814   | 3,0   | 0,0   | 554,8 | 37,4  | 52,8  | 44,4  | 0,0   | 0,0   | 4,0   |
| MIMAT0004819   | 387,8 | 25,0  | 4,6   | 68,3  | 109,8 | 77,9  | 0,0   | 8,2   | 0,0   |
| MIMAT0004920   | 0,0   | 0,0   | 0,0   | 0,0   | 16,2  | 16,0  | 0,0   | 0,0   | 0,0   |
| MIMAT0004921   | 0,0   | 12,5  | 0,0   | 11,3  | 29,5  | 19,6  | 0,0   | 0,0   | 0,0   |
| MIMAT0004928   | 0,0   | 0,0   | 0,0   | 0,0   | 20,7  | 0,0   | 0,0   | 0,0   | 0,0   |
| MIMAT0004945   | 21,0  | 50,0  | 411,5 | 408,5 | 406,8 | 362,6 | 4,3   | 269,7 | 7,9   |
| MIMAT0004947   | 0,0   | 0,0   | 0,0   | 0,0   | 13,0  | 15,5  | 0,0   | 0,0   | 0,0   |
| MIMAT0004949   | 0,0   | 0,0   | 50,9  | 13,7  | 13,6  | 11,9  | 0,0   | 0,0   | 31,7  |
| MIMAT0004954   | 336,7 | 474,9 | 32,4  | 979,7 | 850,1 | 859,8 | 243,1 | 24,5  | 0,0   |
| MIMAT0004957   | 3,0   | 0,0   | 4,6   | 72,4  | 1,9   | 69,1  | 0,0   | 0,0   | 0,0   |
| MIMAT0004959   | 0,0   | 0,0   | 0,0   | 0,0   | 20,1  | 0,0   | 0,0   | 0,0   | 0,0   |
| MIMAT0004976   | 0,0   | 0,0   | 0,0   | 0,0   | 29,5  | 0,0   | 0,0   | 0,0   | 0,0   |
| MIMAT0004982   | 0,0   | 0,0   | 351,4 | 0,0   | 13,0  | 16,0  | 0,0   | 0,0   | 0,0   |
| MIMAT0004984   | 3,0   | 12,5  | 0,0   | 22,0  | 29,8  | 30,9  | 0,0   | 8,2   | 35,7  |
| MIMAT0004984_1 | 3,0   | 25,0  | 0,0   | 23,8  | 31,1  | 27,3  | 0,0   | 0,0   | 39,7  |
| MIMAT0004984_2 | 0,0   | 50,0  | 0,0   | 19,6  | 26,6  | 32,5  | 0,0   | 8,2   | 39,7  |
| MIMAT0004984_3 | 0,0   | 50,0  | 0,0   | 18,4  | 30,1  | 30,9  | 0,0   | 0,0   | 27,8  |
| MIMAT0004984_4 | 3,0   | 62,5  | 0,0   | 17,8  | 32,4  | 35,6  | 4,3   | 0,0   | 39,7  |
| MIMAT0004985   | 0,0   | 0,0   | 0,0   | 66,5  | 59,3  | 28,4  | 4,3   | 0,0   | 0,0   |
| MIMAT0005458   | 0,0   | 0,0   | 0,0   | 13,7  | 0,0   | 13,9  | 0,0   | 0,0   | 0,0   |
| MIMAT0005580   | 0,0   | 0,0   | 0,0   | 0,0   | 21,4  | 0,0   | 0,0   | 0,0   | 0,0   |
| MIMAT0005582   | 174,3 | 0,0   | 448,5 | 35,6  | 20,4  | 34,0  | 0,0   | 0,0   | 0,0   |
| MIMAT0005792   | 0,0   | 12,5  | 37,0  | 80,2  | 110,1 | 150,6 | 17,4  | 228,8 | 83,3  |
| MIMAT0005792_1 | 0,0   | 0,0   | 27,7  | 85,5  | 99,8  | 163,0 | 13,0  | 237,0 | 75,3  |
| MIMAT0005793   | 0,0   | 0,0   | 0,0   | 46,9  | 55,4  | 73,2  | 4,3   | 24,5  | 35,7  |
| MIMAT0005793_1 | 0,0   | 0,0   | 4,6   | 45,1  | 54,4  | 78,9  | 4,3   | 8,2   | 27,8  |
| MIMAT0005797   | 0,0   | 0,0   | 9,2   | 73,0  | 88,7  | 1,5   | 0,0   | 204,3 | 0,0   |
| MIMAT0005825   | 0,0   | 25,0  | 13,9  | 149,6 | 139,9 | 80,5  | 199,7 | 0,0   | 154,6 |
| MIMAT0005874   | 0,0   | 0,0   | 0,0   | 0,0   | 24,6  | 0,0   | 0,0   | 0,0   | 0,0   |
| MIMAT0005884   | 0,0   | 0,0   | 4,6   | 23,8  | 21,7  | 14,4  | 0,0   | 0,0   | 0,0   |
| MIMAT0005919   | 0,0   | 0,0   | 0,0   | 0,0   | 13,9  | 11,3  | 0,0   | 8,2   | 0,0   |
| MIMAT0005919_1 | 0,0   | 0,0   | 0,0   | 0,0   | 15,2  | 7,2   | 0,0   | 0,0   | 0,0   |
| MIMAT0005933   | 0,0   | 0,0   | 0,0   | 0,0   | 27,9  | 0,0   | 0,0   | 0,0   | 0,0   |
| MIMAT0005936   | 0,0   | 0,0   | 0,0   | 28,5  | 35,3  | 15,5  | 52,1  | 0,0   | 71,4  |
| MIMAT0005943   | 0,0   | 0,0   | 0,0   | 0,0   | 12,3  | 18,6  | 0,0   | 130,7 | 4,0   |

|                |        |       |       |       |       |       |       |       |       |
|----------------|--------|-------|-------|-------|-------|-------|-------|-------|-------|
| MIMAT0005948   | 3,0    | 0,0   | 18,5  | 0,0   | 25,3  | 16,5  | 0,0   | 0,0   | 0,0   |
| MIMAT0005950   | 0,0    | 37,5  | 0,0   | 16,6  | 21,1  | 0,0   | 0,0   | 0,0   | 0,0   |
| MIMAT0005951   | 330,7  | 762,4 | 32,4  | 530,8 | 302,8 | 417,3 | 199,7 | 220,6 | 222,0 |
| MIMAT0006764   | 0,0    | 0,0   | 0,0   | 25,5  | 11,3  | 15,0  | 8,7   | 24,5  | 7,9   |
| MIMAT0006764_1 | 0,0    | 0,0   | 0,0   | 25,5  | 11,0  | 13,4  | 0,0   | 8,2   | 11,9  |
| MIMAT0006789   | 0,0    | 0,0   | 4,6   | 0,0   | 21,4  | 17,5  | 65,1  | 204,3 | 0,0   |
| MIMAT0007881   | 0,0    | 0,0   | 0,0   | 5,3   | 15,5  | 0,0   | 0,0   | 0,0   | 0,0   |
| MIMAT0010133   | 468,9  | 0,0   | 0,0   | 24,9  | 49,2  | 37,1  | 134,6 | 8,2   | 4,0   |
| MIMAT0015006   | 0,0    | 0,0   | 0,0   | 0,0   | 0,0   | 45,4  | 0,0   | 0,0   | 0,0   |
| MIMAT0015032   | 315,6  | 0,0   | 4,6   | 87,9  | 78,4  | 134,6 | 4,3   | 49,0  | 249,8 |
| MIMAT0015032_1 | 321,6  | 0,0   | 0,0   | 78,4  | 80,0  | 133,6 | 4,3   | 65,4  | 297,4 |
| MIMAT0015043   | 51,1   | 75,0  | 203,4 | 12,5  | 9,7   | 22,7  | 91,2  | 130,7 | 138,8 |
| MIMAT0015050   | 0,0    | 0,0   | 4,6   | 87,3  | 268,8 | 69,6  | 0,0   | 0,0   | 230,0 |
| MIMAT0016888   | 0,0    | 12,5  | 0,0   | 0,0   | 23,0  | 19,6  | 0,0   | 0,0   | 0,0   |
| MIMAT0017981   | 0,0    | 0,0   | 0,0   | 0,0   | 13,9  | 36,6  | 0,0   | 0,0   | 0,0   |
| MIMAT0017982   | 0,0    | 0,0   | 9,2   | 42,8  | 81,9  | 21,7  | 0,0   | 0,0   | 0,0   |
| MIMAT0017990   | 0,0    | 0,0   | 0,0   | 58,2  | 17,8  | 36,6  | 99,8  | 8,2   | 0,0   |
| MIMAT0017994   | 174,3  | 399,9 | 32,4  | 410,3 | 256,8 | 415,7 | 182,3 | 539,3 | 186,4 |
| MIMAT0018104   | 0,0    | 0,0   | 0,0   | 5,3   | 16,5  | 32,5  | 0,0   | 0,0   | 0,0   |
| MIMAT0018187_1 | 0,0    | 0,0   | 0,0   | 0,0   | 11,3  | 0,0   | 43,4  | 65,4  | 0,0   |
| MIMAT0018965   | 0,0    | 325,0 | 0,0   | 12,5  | 21,1  | 97,0  | 0,0   | 16,3  | 4,0   |
| MIMAT0019000   | 0,0    | 0,0   | 0,0   | 0,0   | 17,8  | 0,0   | 143,3 | 0,0   | 0,0   |
| MIMAT0019210   | 0,0    | 0,0   | 0,0   | 0,0   | 21,7  | 0,0   | 0,0   | 0,0   | 0,0   |
| MIMAT0019214   | 0,0    | 0,0   | 0,0   | 0,0   | 17,5  | 0,0   | 0,0   | 0,0   | 0,0   |
| MIMAT0019226   | 2002,0 | 0,0   | 0,0   | 0,0   | 0,0   | 0,5   | 0,0   | 0,0   | 0,0   |
| MIMAT0019743   | 0,0    | 0,0   | 0,0   | 0,0   | 16,8  | 0,0   | 0,0   | 0,0   | 0,0   |
| MIMAT0019772   | 0,0    | 0,0   | 0,0   | 0,0   | 17,5  | 0,0   | 0,0   | 0,0   | 0,0   |
| MIMAT0019855   | 3,0    | 0,0   | 0,0   | 3,6   | 0,3   | 34,0  | 0,0   | 0,0   | 198,3 |
| MIMAT0019856   | 0,0    | 0,0   | 166,4 | 0,0   | 37,9  | 11,9  | 34,7  | 24,5  | 0,0   |
| MIMAT0019880   | 0,0    | 0,0   | 0,0   | 0,0   | 21,4  | 17,0  | 0,0   | 0,0   | 0,0   |
| MIMAT0020924   | 0,0    | 0,0   | 0,0   | 0,0   | 24,0  | 6,2   | 0,0   | 0,0   | 0,0   |
| MIMAT0021043   | 0,0    | 0,0   | 0,0   | 0,0   | 18,1  | 16,5  | 0,0   | 0,0   | 0,0   |
| MIMAT0022693   | 0,0    | 0,0   | 0,0   | 12,5  | 16,2  | 17,5  | 0,0   | 416,7 | 0,0   |
| MIMAT0022710   | 0,0    | 0,0   | 0,0   | 0,0   | 19,4  | 0,0   | 169,3 | 0,0   | 0,0   |
| MIMAT0022714   | 3,0    | 0,0   | 4,6   | 10,7  | 16,8  | 0,5   | 0,0   | 0,0   | 0,0   |
| MIMAT0022727   | 0,0    | 0,0   | 0,0   | 19,6  | 12,6  | 0,0   | 0,0   | 0,0   | 174,5 |
| MIMAT0026482   | 0,0    | 0,0   | 0,0   | 0,0   | 23,3  | 0,0   | 0,0   | 0,0   | 0,0   |
| MIMAT0027369   | 0,0    | 0,0   | 0,0   | 0,0   | 46,0  | 15,0  | 0,0   | 0,0   | 154,6 |
| MIMAT0027384   | 0,0    | 0,0   | 0,0   | 52,3  | 0,0   | 23,7  | 0,0   | 0,0   | 210,2 |
| MIMAT0027395   | 0,0    | 0,0   | 0,0   | 16,6  | 42,4  | 0,0   | 0,0   | 0,0   | 0,0   |
| MIMAT0027445   | 0,0    | 0,0   | 0,0   | 20,8  | 0,0   | 12,4  | 0,0   | 0,0   | 0,0   |
| MIMAT0027513   | 0,0    | 0,0   | 0,0   | 0,0   | 20,1  | 0,0   | 0,0   | 0,0   | 0,0   |
| MIMAT0027530   | 0,0    | 0,0   | 0,0   | 20,2  | 10,4  | 0,0   | 0,0   | 0,0   | 0,0   |
| MIMAT0027539   | 0,0    | 0,0   | 0,0   | 0,0   | 21,1  | 0,0   | 0,0   | 0,0   | 0,0   |
| MIMAT0027587   | 0,0    | 437,4 | 4,6   | 27,9  | 104,3 | 82,5  | 0,0   | 0,0   | 0,0   |
| MIMAT0027616   | 0,0    | 0,0   | 0,0   | 0,0   | 18,5  | 0,0   | 0,0   | 0,0   | 0,0   |
| MIMAT0027637   | 291,6  | 0,0   | 0,0   | 0,0   | 25,9  | 0,0   | 0,0   | 0,0   | 0,0   |
| MIMAT0027689   | 0,0    | 0,0   | 0,0   | 20,8  | 0,0   | 9,3   | 99,8  | 0,0   | 0,0   |

|                     |        |        |        |       |        |        |       |       |      |
|---------------------|--------|--------|--------|-------|--------|--------|-------|-------|------|
| <b>MIMAT0030021</b> | 0,0    | 0,0    | 0,0    | 21,4  | 19,8   | 5,2    | 156,3 | 0,0   | 0,0  |
| <b>MIMAT0030413</b> | 0,0    | 12,5   | 0,0    | 54,6  | 56,7   | 64,0   | 0,0   | 0,0   | 0,0  |
| <b>MIMAT0030414</b> | 1509,0 | 1424,8 | 1262,2 | 989,2 | 1203,5 | 1256,0 | 473,2 | 49,0  | 83,3 |
| <b>MIMAT0039764</b> | 0,0    | 0,0    | 0,0    | 102,1 | 9,7    | 99,5   | 4,3   | 212,5 | 0,0  |
| <b>MIMAT0044657</b> | 0,0    | 0,0    | 0,0    | 7,1   | 21,1   | 3,1    | 0,0   | 0,0   | 0,0  |

<sup>a</sup> Accession number of miRNAs in miRbase (the microRNA database)  
(<https://www.mirbase.org/index.shtml>)

<sup>b</sup> Size exclusion chromatography.

<sup>c</sup> Isopycnic ultracentrifugation using iodixanol gradients.

<sup>d</sup> Size exclusion chromatography and isopycnic ultracentrifugation using iodixanol gradients.
